# Supplementary material
Source: PubMed Central journal article supplement (PMC2481380)
Supplement: 0804119105_SA1.pdf [file 0804119105_SA1.pdf]

## Supporting Information

### 1 Proof of the evolutionary recurrence for the node degree generating function (Eq. 2)

The generating function for node degrees  $N_k^{(n)}$  after  $n$  duplications is defined as,

$$F^{(n)}(x) = \sum_{k \geq 0} \langle N_k^{(n)} \rangle x^k. \quad (\text{S1})$$

where  $\langle \cdot \rangle$  corresponds to the ensemble average over *all* possible trajectories of the evolutionary dynamics. The  $x^k$  term of  $F^{(n)}(x)$  ‘‘counts’’ the statistical number of nodes with exactly  $k$  links (one  $x$  per link).

At each time step  $n \rightarrow n + 1$ , each node can be either duplicated with probability  $q$ , giving rise to two node copies, or non-duplicated with probability  $1 - q$ . Hence, in the general case with asymmetric divergence of duplicates (with a more conserved, ‘‘old’’ copy and a more divergent, ‘‘new’’ copy), there are 3  $F^{(n)}(A_i(x))$  contributions to the updated  $F^{(n+1)}(x)$  coming from each node type,  $i = s, o, n$ , for singular nodes, old and new duplicates,

$$F^{(n+1)}(x) = (1-q)F^{(n)}(A_s(x)) + qF^{(n)}(A_o(x)) + qF^{(n)}(A_n(x)) \quad (\text{S2})$$

where the substitutions  $x \rightarrow A_i(x)$  in each  $F^{(n)}$  terms ( $i = s, o, n$ ) should reflect the statistical fate of a particular link ‘‘ $x$ ’’ between a node of type  $i$  and a neighbor node which is either singular ( $s$ ) with probability  $1 - q$  or duplicated ( $o/n$ ) with probability  $q$ . In practice, the duplication of a fraction  $q$  of (neighbor) nodes first leads to the replacement  $x \rightarrow (1-q)x + qx^2$  corresponding to the maximum preservation of links for both singular ( $x$ ) and duplicated  $o/n$  ( $x^2$ ) neighbors, and then to the substitution  $x \rightarrow \gamma_{ij}x + \delta_{ij}$  for each type of neighbor nodes  $j = s, o, n$  where  $\gamma_{ij}$  is the probability to preserve a link ‘‘ $x$ ’’ (and  $\delta_{ij} = 1 - \gamma_{ij}$  the probability to erase it). Hence, the complete substitution corresponding to the GDD model reads  $x \rightarrow (1-q)(\gamma_{is}x + \delta_{is}) + q(\gamma_{io}x + \delta_{io})(\gamma_{in}x + \delta_{in}) = A_i(x)$  for  $i = s, o, n$ , leading to Eq.(S2).

### 2 Statistical properties of the model

The approach we use to study the evolution of PPI networks under general duplication-divergence processes is based on ensemble averages over all evolutionary trajectories. We characterize, in particular, PPI network evolution in terms of average number of nodes and links and average degree distribution. Yet, in order for these average features to be representative of typical network dynamics, statistical fluctuations around the mean trajectory should not be too large. In practice, it means that the relative variance  $\chi_Q^2(n)$  for a feature  $Q^{(n)}$  should not diverge in the limit  $n \rightarrow \infty$ ,

$$\chi_Q^2(n) = \left( \frac{\langle Q^2 \rangle - \langle Q \rangle^2}{\langle Q \rangle^2} \right)^{(n)} < \infty \text{ as } n \rightarrow \infty$$

and more generally the  $p$ th moment of  $Q^{(n)}$  should not diverge more rapidly than the  $p$ th power of the average. If it is not the case, successive moments exhibit a whole multifractal spectrum and ensemble averages do not represent typical realizations of the evolutionary dynamics. In order to check whether it is or not the case here for general duplication-divergence models, we proceed by analyzing the probability distributions for the number of links and nodes.

The number of link  $L$  has a probability distribution  $\mathcal{P}(L)$  whose generating function  $\mathcal{P}(x) = \sum_{L \geq 0} \mathcal{P}(L)x^L$  satisfies

$$\begin{aligned} \mathcal{P}^{(n+1)}(x) &= \mathcal{P}^{(n)}[a(x)], \\ a(x) &= (1-q)^2(\gamma_{ss}x + \delta_{ss}) + 2q(1-q)(\gamma_{so}x + \delta_{so})(\gamma_{sn}x + \delta_{sn}) + q^2(\gamma_{oo}x + \delta_{oo})(\gamma_{nn}x + \delta_{nn})(\gamma_{on}x + \delta_{on})^2. \end{aligned} \quad (\text{S3})$$

This relation can be justified in a way similar to that of the fundamental evolutionary recurrence above: each node of the initial graph will be either duplicated  $d$  with probability  $q$  or kept singular  $s$  with probability  $1 - q$ , leading to three possible node combinations for each link:  $s - s$  link with probability  $(1 - q)^2$ ,  $s - d$  or  $d - s$  links with probability  $2q(1 - q)$  and  $d - d$  link with probability  $q^2$ . Then each  $s - s$  link is either kept with  $\gamma_{ss}$  and erased with  $\delta_{ss}$  leading to the substitution  $x \rightarrow \gamma_{ss}x + \delta_{ss}$  in the corresponding term; each  $s - d$  or  $d - s$  link can lead to two links between  $s$  and each  $o/n$  duplicate, *i.e.*  $x \rightarrow (\gamma_{so}x + \delta_{so})(\gamma_{sn}x + \delta_{sn})$ , while each  $d - d$  link can lead up to 4 links after duplication, *i.e.*  $x \rightarrow (\gamma_{oo}x + \delta_{oo})(\gamma_{nn}x + \delta_{nn})(\gamma_{on}x + \delta_{on})^2$ . Combining all these operations eventually yields Eq.(S3).

Successive moments of this distribution are obtained taking successive derivatives of Eq.(S3),

$$A_k^{(n)} = \partial_x^k \mathcal{P}^{(n)}(x) \Big|_{x=1}, \quad (\text{S4})$$

and lead to the following recurrence relations

$$A_k^{(n+1)} = [h(1)]^k A_k^{(n)} + \frac{C}{2} k(k-1) [h(1)]^{k-2} A_{k-1}^{(n)} + \dots$$

where  $h(1) = a'(1) = (1 - q)\Gamma_s + q\Gamma_o + q\Gamma_n$  and  $C = a''(1)$  are constants depending on microscopic parameters. These relations can be solved to get the leading order behavior of successive moments

$$A_k^{(n)} = \tilde{A}_k [h(1)]^{kn} \left( 1 + \mathcal{O}([h(1)]^{-n}) \right), \quad (\text{S5})$$

where  $\tilde{A}_k$  are some functions of microscopic parameters.

The latter relation implies that the  $k$ th moment is equal (modulo some finite constant) to the  $k$ th power of the first moment in the leading order when  $n \rightarrow \infty$ . This suggests that in this limit the probability distribution should take a scaling form,

$$\mathcal{P}^{(n)}(L) \simeq \frac{1}{\langle L^{(n)} \rangle} \mathcal{F} \left( \frac{L}{\langle L^{(n)} \rangle} \right), \quad n \gg 1. \quad (\text{S6})$$

This hypothesis can be verified directly from the explicit form of Eq.(S3)(see Appendix A for details).

Although we are not able to determine the scaling function  $\mathcal{F}$  from previous considerations, we can derive some of its properties from the successive moments Eq.(S4): in particular for  $n \gg 1$  the link distribution and the function  $\mathcal{F}$  do not present a vanishing width around their mean value but instead a finite limit width corresponding to a finite relative variance,

$$\chi_L^{2(n)} = \left( \frac{\langle L^2 \rangle - \langle L \rangle^2}{\langle L \rangle^2} \right)^{(n)} \rightarrow \frac{1}{L^{(0)}} \left( \frac{a''(1)}{a'(1)(a'(1) - 1)} - 1 \right) < \infty,$$

This relation is found solving explicitly Eq.(S4) for  $k = 1$  and  $k = 2$  given the initial number of links  $L^{(0)}$ . Hence, although fluctuations in the number of links are important, they remain of the same order of magnitude as the mean value, Fig. S1. This result is in fact rather surprising for a model which clearly exhibits a memory of its previous evolutionary states and might, in principle, develop diverging fluctuations in the asymptotic limit.

Fluctuations for the total number of nodes,  $N^{(n)}$ , and the number of nodes of degree  $k \geq 1$ ,  $N_k^{(n)}$ , can also be evaluated using the previous result on link fluctuations and the double inequality  $N_k \leq N \leq 2L$ , valid for *any* graph realization. Indeed, we obtain the following relations between the  $p$ th moments and the  $p$ th power of the corresponding first moments,

$$\begin{aligned} \langle (N^p)^{(n)} \rangle &\leq 2^p \langle (L^p)^{(n)} \rangle \propto 2^p \langle L^{(n)} \rangle^p = (\bar{k}^{(n)})^p \langle N^{(n)} \rangle^p, \\ \langle (N_k^p)^{(n)} \rangle &\leq 2^p \langle (L^p)^{(n)} \rangle \propto 2^p \langle L^{(n)} \rangle^p = (\bar{k}^{(n)})^p \langle N^{(n)} \rangle^p = \left( \frac{\bar{k}^{(n)}}{p_k} \right)^p \langle N_k^{(n)} \rangle^p. \end{aligned}$$

using  $\langle L^{(n)} \rangle = \bar{k}^{(n)} \langle N^{(n)} \rangle$  and  $\langle N_k^{(n)} \rangle = p_k^{(n)} \langle N^{(n)} \rangle$ , for all  $n \geq 1$  and  $k \geq 1$ . Hence, we find that fluctuations for both  $N$  and  $N_k$  remain finite in the asymptotic limit for *linear* asymptotic regimes corresponding to exponential or scale-free degree distributions with *finite* limit values for both mean degree,  $\bar{k}^{(n)} \rightarrow \bar{k} < \infty$  and degree distribution  $p_k^{(n)} \rightarrow p_k > 0$ , for all  $k \geq 1$ . This corresponds presumably to the most biologically relevant networks. On the other hand, for *non-linear* (scale-free or dense) asymptotic regimes previous arguments do not apply as  $\bar{k}^{(n)} \rightarrow \infty$  (and  $p_k^{(n)} \rightarrow 0$  for dense regime) when  $n \rightarrow \infty$ . The numbers of nodes  $N^{(n)}$  and  $N_k^{(n)}$  grow exponentially more slowly than the number of links  $L^{(n)}$  in this case, and the growth process might develop, in principle, diverging fluctuations as compared to their averages,  $\langle N^{(n)} \rangle$  and  $\langle N_k^{(n)} \rangle$ , respectively. Yet, numerical simulations (see section 8 below) tend to show that it is actually *not* the case, suggesting that the ensemble average approach we have used to study the GDD model is still valid for *non-linear* asymptotic regimes.

In summary, we found that the general duplication-divergence dynamics is not *stricto sensu* ‘self-averaging’ [2] (*i.e.*  $\chi^{(n)} \rightarrow 0$ ), however, fluctuations remain finite (*i.e.*  $\chi^{(n)} < \infty$ ) in the asymptotic limit  $n \rightarrow \infty$ , which corresponds to a so-called ‘fractal’ regime. This implies that ensemble averages of PPI network evolution are actually good representatives of typical PPI network realizations in biologically relevant regimes. Conversely, an ensemble averaging approach would become inappropriate in the presence of diverging fluctuations ( $\chi^{(n)} \rightarrow \infty$ ) corresponding to a so-called ‘multifractal’ regime. Hence, our findings on the finite fluctuations of the model justifies its statistical foundations and, thereby, our theoretical approach based on functional recurrences between successive generating functions.

Interestingly, Fig. S1 shows that duplication-divergence evolution do *not* tend to be more ‘self-averaging’ in the low growth rate limit, nor equivalently in the local duplication limit ( $q \ll 1$ ). This means that the ‘self-averaging’ property suggested in previous works on the basis of numerical simulations [2] might actually results as a consequence of the time-linear, single protein duplication dynamics adopted by these authors.

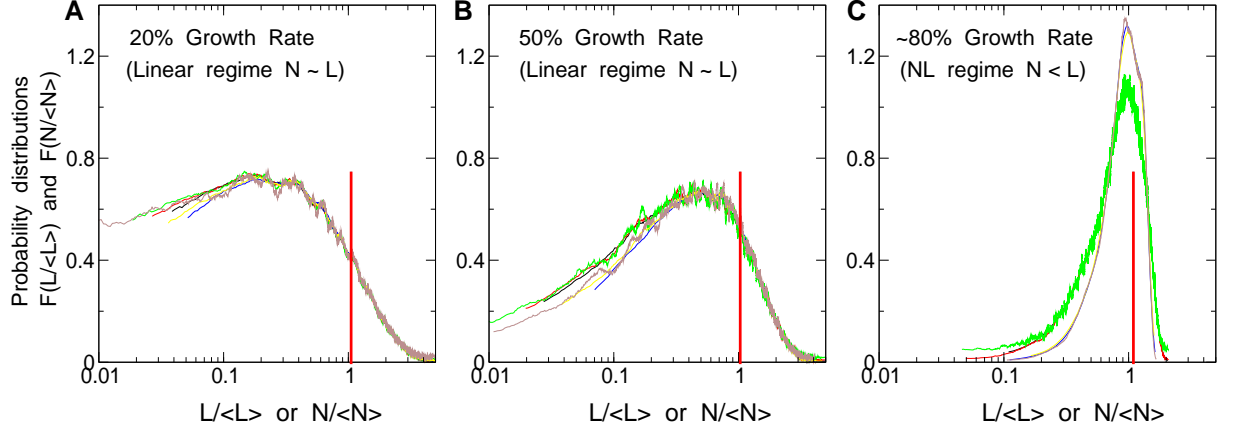

Figure S1: **Numerical simulations of link and node probability distributions.** Scaling functions  $\mathcal{F}(x/\langle x \rangle)$ , eq.(S6), obtained for link probability distribution (brown,  $x = L$ ) and node probability distribution (green,  $x = N$ ) under whole genome duplication dynamics with 20%, 50% and 80% network growth rates, respectively. These distributions are stationary in all three cases and are very close for nodes and links in linear dynamical regimes, as expected (**A** and **B**), and distinct for non-linear regimes (**C**).

### 3 Asymptotic methods

In this section, we give more details about the asymptotic analysis of node degree distribution defined by the recurrence relation on its normalized generating function  $p^{(n)}(x)$ , Eq.(6).

First of all, the series of  $p^{(n)}(x)$  can be shown to converge at each point at least for some initial conditions. Indeed, let us introduce a linear operator  $\mathcal{M}$  defined on functions continuous on  $[0, 1]$  and acting according to Eq.(6), *i.e.*,  $p^{(n+1)} = \mathcal{M}p^{(n)}$ . For two non-negative functions  $f(x)$  and  $g(x)$  so that  $f(0) = 0$ ,  $g(0) = 0$ ,  $f(1) = 1$  and  $g(1) = 1$ , we have,

$$\forall x \in [0, 1] \quad f(x) \leq g(x) \Rightarrow \forall x \in [0, 1] \quad (\mathcal{M}f)(x) \leq (\mathcal{M}g)(x). \quad (\text{S7})$$

It can be verified that if  $p^{(0)}(x) = x$  (one simple link as initial condition),  $\mathcal{M}p^{(0)}(x) \leq p^{(0)}(x) \forall x \in [0, 1]$  and by consequence, when applying  $\mathcal{M}^n$  to this inequality, the following holds

$$0 \leq p^{(n+1)}(x) \leq p^{(n)}(x), \quad \forall x \in [0, 1]$$

which means that at each point the series of  $p^{(n)}(x)$  is decreasing and converges to some non-negative value  $p(x)$ . Furthermore, numerical simulations show that for an arbitrary initial condition, there exists an  $n_0 > 1$  sufficiently large so that  $p^{(n)}(x)$  decreases for  $n \geq n_0$ . Hence, we can take the limit  $n \rightarrow \infty$  on both sides of Eq.(6) to get the Eq.(9) for the limit function  $p(x)$ .

We analyze the properties of this generating function  $p(x)$  for the limit degree distribution, using asymptotic methods. Indeed, we have no mean to solve analytically this functional equation to precisely obtain the corresponding limit degree distribution, but we have enough information to deduce its asymptotic behavior at large  $k$ , since it is directly related to the asymptotic properties of  $p(x)$  for  $x \rightarrow 1$ . In the following, we note  $h(\alpha) = (1 - q)\Gamma_s^\alpha + q\Gamma_o^\alpha + q\Gamma_n^\alpha$ , following the same notation as in the main text.

First, we consider the relation between successive derivatives of  $p(x)$  at  $x = 1$  deduced from Eq.(6) by taking the corresponding number of derivatives, Eq.(10),

$$\left[1 - \frac{h(k)}{\Delta}\right] \partial_x^k p(1) = \sum_{l=[k/2]}^k \alpha_{k,l} \partial_x^l p(1), \quad (\text{S8})$$

with some positive coefficients  $\alpha_{k,l}$ . The value of  $\Delta$  in this relation is still unknown and should be determined self-consistently with  $p(x)$ . Each of these derivatives can also be obtained as a limit of value  $\partial_x^k p(1) = \lim_{n \rightarrow \infty} \partial_x^k p^{(n)}(1)$ , with the following recurrence relation for  $\partial_x^k p^{(n)}(1) = m_k^{(n)}$

$$m_k^{(n+1)} = \frac{h(k)}{\Delta^{(n)}} m_k^{(n)} + \frac{\tilde{C}}{2} k(k-1) \frac{h(k-2)}{\Delta^{(n)}} m_{k-1}^{(n)} + \dots \quad (\text{S9})$$

directly derived from Eq.(6). Different regimes can be identified depending on the general convex shape of  $h(\alpha)$  ( $\partial_\alpha^2 h(\alpha) \geq 0$ ).

**Regular regimes** -  $h(\alpha)$  strictly decreasing for  $\alpha > 0$  iff  $M' = \max_i(\Gamma_i) < 1$ , for  $i = s, o, n$ .

In this case, if we suppose that  $p'(1)$  is finite, all the derivatives of  $p(x)$  at  $x = 1$  are finite since  $\Delta = h(1)$  and  $h(k) < h(1)$  for  $\forall k \geq 2$ . In fact, the alternative situation  $p'(1) = \infty$  and  $\Delta < h(1)$  is not possible as it would imply that some first moments in Eq.(S9), at least  $m_1^{(n)}$  and  $m_2^{(n)}$ , would diverge exponentially as  $(h(1)/\Delta)^n$ . However, since  $h(k) < h(1)$  for  $k \geq 2$ , this would contradict the fact that the  $n$ th moment grows more rapidly than the  $n$ th power of the first one. Hence, we must have  $\Delta = h(1)$  and the solution is not singular at  $x = 1$  but may have a singularity at some  $x_0 > 1$ .

Taking an ansatz for the asymptotic expansion in the form

$$p(x) = A_0 - A_1(x_0 - x) + A_2(x_0 - x)^2 + A_\alpha(x_0 - x)^\alpha + \mathcal{O}((x_0 - x)^{\alpha+1}). \quad (\text{S10})$$

and inserting it in Eq.(9) we find that, in order to have the singularity at  $x = x_0$  present on both sides of the equation,  $x_0$  has to be chosen as the root closest to 1 in the following three equations,

$$A_s(x) = x, \quad A_o(x) = x, \quad A_n(x) = x, \quad (\text{S11})$$

where,  $A_i(x) = (1-q)(\gamma_{is}x + \delta_{is}) + q(\gamma_{io}x + \delta_{io})(\gamma_{in}x + \delta_{in})$  for  $i = s, o, n$ , or explicitly (since the second root is always 1)

$$x_0 = \min\left(\frac{(1-q)\delta_{ss} + q\delta_{so}\delta_{sn}}{q\gamma_{so}\gamma_{sn}}, \frac{(1-q)\delta_{so} + q\delta_{oo}\delta_{on}}{q\gamma_{oo}\gamma_{on}}, \frac{(1-q)\delta_{sn} + q\delta_{on}\delta_{nn}}{q\gamma_{on}\gamma_{nn}}\right).$$

Since  $h(\alpha)$  is strictly decreasing when  $\Gamma_s < 1$ ,  $\Gamma_o < 1$  and  $\Gamma_n < 1$ , it is straightforward to prove that all three values are greater than one, and hence,  $x_0 > 1$  for regular regimes.

The value of  $\alpha$  is obtained from the same equation Eq.(6) by comparing the coefficients in front of the singular terms when developing each term near  $x = x_0$

$$\alpha = \frac{\ln(\epsilon_i \Delta)}{\ln(2 - \Gamma_i)}, \quad (\text{S12})$$

where  $i = s, o$  or  $n$  if  $x_0$  is the solution of  $A_i(x) = x$ ,  $\epsilon_s = (1-q)^{-1}$ ,  $\epsilon_o = \epsilon_n = q^{-1}$ , and replacing also  $\epsilon_i \rightarrow 1/2\epsilon_i$  or  $1/3\epsilon_i$  if two or all three  $\Gamma_i$ 's happen to be equal, respectively.

We recall that for  $h(\alpha)$  under consideration  $\bar{k} = p'(1)$  is finite and  $\Delta = h(1)$ . Therefore, in this regime the asymptotic growth of the graph is exponential with respect to the number of links and the number of nodes with a common growth rate  $\Delta = h(1)$ . We call this asymptotic behavior “linear” because  $\langle N^{(n)} \rangle$  and  $\langle N^{(n)} \rangle$  are asymptotically proportional.

The decrease of the limit degree distribution for  $k \gg 1$  is given by [3]

$$p_k \propto k^{-\alpha-1} x_0^{-k} \left(1 + \mathcal{O}\left(\frac{1}{k}\right)\right), \quad k \gg 1 \quad (\text{S13})$$

and is thus *exponential* with a power law prefactor. When one of the  $\Gamma_i$ 's tends to one, simultaneously  $x_0 \rightarrow 1$  and  $\alpha \rightarrow \infty$  and, as we will see below, we meet the singular scale-free regime for the limit mean degree distribution.

The emergence of an exponential tail for  $p_k$  when  $k \gg 1$  naturally comes from the fact that at each duplication step the probability for a node to duplicate one of its links (keeping both the original link and its copy),  $q\gamma_{oo}\gamma_{on}$  for  $o$  nodes,  $q\gamma_{so}\gamma_{sn}$  for  $s$  nodes and  $q\gamma_{on}\gamma_{nn}$  for  $n$  nodes, is smaller than the corresponding probabilities to delete the initial link,  $(1-q)\delta_{so} + q\delta_{oo}\delta_{on}$ ,  $(1-q)\delta_{ss} + q\delta_{so}\delta_{sn}$  and  $(1-q)\delta_{sn} + q\delta_{on}\delta_{nn}$  (it is in fact equivalent to  $x_0 > 1$ ). For this reason at each duplication only few nodes are preserved and they keep only few of their links, the graph contains many small components and has no memory about previous states. In a different way, we can develop this argument in terms of a particular node degree evolution. When  $\Gamma_o < 1$ ,  $\Gamma_s < 1$  and  $\Gamma_n < 1$ , nodes  $o$  and  $s$  as well as their copies  $n$  loose links in proportion to their connectivities. It means that the number of nodes of a given connectivity is modified by a Poissonian prefactor, representing the overall tendency to follow an exponentially decreasing distribution for large number of duplications.

**Singular regimes** -  $h(\alpha)$  has a minimum on  $\alpha > 0$  iff  $M' = \max_i(\Gamma_i) > 1$ , for  $i = s, o, n$ .

In this case, from Eq.(S8) we can be sure to have a negative value for some derivative: since  $h(\alpha)$  has a unique minimum, there exists an integer  $r \geq 1$  so that  $h(r) < \Delta < h(r+1)$  implying that  $\partial_x^{r+1} p(1) < 0$  which is impossible by construction. In fact, this indicates the presence of an irregular term in the development of  $p(x)$  in the vicinity of  $x = 1$ , and for this reason the function itself is  $r$  times differentiable at this point while its  $(r+1)$ th and following derivatives do not exist. Hence, we take an ansatz for  $p(x)$  in the neighborhood of  $x = 1$  using the following form

$$p(x) = 1 - A_1(1-x) + A_2(1-x)^2 + A_\alpha(1-x)^\alpha + \mathcal{O}((1-x)^{\alpha+1}) \quad (\text{S14})$$

A priori, we do not know the exact value of  $\Delta$ , and it is to be determined self-consistently with  $p(x)$ . We then substitute Eq.(S14) into Eq.(9) to get a “characteristic” equation relating  $\alpha$  and  $\Delta$ ,

$$h(\alpha) = (1-q)\Gamma_s^\alpha + q\Gamma_o^\alpha + q\Gamma_n^\alpha = \Delta. \quad (\text{S15})$$

If we find a nontrivial value of  $\alpha^* > 0$  that are solutions of this equation, it will give us an asymptotic expression for the coefficients of the generating function of the *scale free* form

$$p_k \propto k^{-\alpha^*-1} \left( 1 + \mathcal{O}\left(\frac{1}{k}\right) \right), \quad k \gg 1. \quad (\text{S16})$$

Note that when the solution takes an integer value  $\alpha^* = r \geq 1$  the form of the asymptotic expansion should differ from Eq.(S14) because formally it is not longer singular in this case. In fact, in the anzats a logarithmic prefactor should be added in the singular term

$$p(x) = 1 - A_1(1-x) + A_2(1-x)^2 + \dots + A_r(1-x)^r + \tilde{A}_r(1-x)^r \ln(1-x) + \mathcal{O}((1-x)^{r+1}) \quad (\text{S17})$$

In order for this asymptotic expansion to satisfy Eq.(9), we should have  $h(r) = \Delta$ , as before, as well as an additional condition for  $r = 1$  namely  $h'(1) = 0$ .

Note also, that the characteristic equation  $h(\alpha) = \Delta$  can be recovered directly (although less rigorously) using the connectivity change  $k \rightarrow k\Gamma_i$  on average for  $i$ -type of nodes ( $i = s, o, n$ ) at each duplication and the following continuous approximation,  $N^{(n)} = \sum_k N_k^{(n)} \simeq \int_u N_u^{(n)} du$ ,

$$\Delta = \frac{\langle N^{(n+1)} \rangle}{\langle N^{(n)} \rangle} \simeq \frac{\int_k \langle (1-q)N_{k\Gamma_s}^{(n)} \Gamma_s + qN_{k\Gamma_o}^{(n)} \Gamma_o + qN_{k\Gamma_n}^{(n)} \Gamma_n \rangle dk}{\int_u \langle N_u^{(n)} \rangle du} = \frac{((1-q)\Gamma_s^\alpha + q\Gamma_o^\alpha + q\Gamma_n^\alpha) \int_u \langle N_u^{(n)} \rangle du}{\int_u \langle N_u^{(n)} \rangle du} = h(\alpha)$$

where we assumed that  $\langle N_k^{(n)} \rangle \propto k^{-\alpha-1}$ .

Three cases should now be distinguished depending on the signs of  $h'(0)$  and  $h'(1)$  (see Fig. 3 in main text):

**1.**  $h'(0) < 0$  and  $h'(1) < 0$ .

Since  $h(\alpha) > h(1)$  for  $\alpha < 1$ , any solution of Eq.(S15) has to be greater than one (as  $\Delta \leq h(1)$ ) which implies, by virtue of Eq.(S16),  $\bar{k} < \infty$  and consequently  $\Delta = h(1)$  exactly (which is consistent with previous considerations). So, for the parameters satisfying  $h'(1) < 0$  the value of  $\alpha$  we are looking for is the unique solution,  $\alpha^* > 1$ , of

$$h(\alpha^*) = (1-q)\Gamma_s^{\alpha^*} + q\Gamma_o^{\alpha^*} + q\Gamma_n^{\alpha^*} = (1-q)\Gamma_s + q\Gamma_o + q\Gamma_n = h(1) \quad (\text{S18})$$

The other solution  $\alpha = 1$  should be discarded here as it corresponds to a solution only if  $h'(1) = 0$  (see proof for the most general duplication-divergence hybrid models, below).

Evidently, in this regime there exists an entier  $k_0 \geq 1$  for which

$$h(k_0) < h(\alpha^*) \leq h(k_0 + 1),$$

and so all the derivatives of  $p^{(k)}(1)$  are finite for  $k \geq k_0$  while all following derivatives are infinite. Finally, when we fix  $\Gamma_i$  which are less than one and make other  $\Gamma_i \rightarrow 1$  the value of  $\alpha^*$  tends to infinity, the scale free regime Eq.(S16) meets the exponential one Eq.(S13).

**2.**  $h'(0) < 0$  and  $h'(1) \geq 0$ .

The condition  $\Delta \leq h(1)$  implies that only solutions with  $0 < \alpha \leq 1$  are possible. Therefore, surely  $\bar{k} = \infty$  in this case but there is no additional constraints *a posteriori* on  $\Delta$  which might take, in principle, a whole range of possible values between  $\min_\alpha(h(\alpha))$  and  $\min(h(0), h(1))$ . Yet, numerical simulations suggest that there might still be a unique asymptotic node growth rate  $\Delta$  regardless of initial conditions or evolution trajectories, although convergence is extremely slow (See *Numerical simulations* below).

**3.**  $h'(0) \geq 0$  (we always have  $h'(1) > 0$  in this case).

The minimum of  $h(\alpha)$  is achieved for  $\alpha_0 < 0$  in this case, and  $\Delta \leq 1 + q \leq h(1)$ . Yet because solutions of Eq.(S15) cannot be negative by definition of  $p(x)$ , the only possibility is  $\Delta = 1 + q$ , implying that the graph grows at the maximum pace. From the point of view of the graph topology, it means that the mean degree distribution is not stationary and for any fixed  $k$  the mean fraction of nodes with this connectivity  $k$  tends to zero when  $n \rightarrow \infty$ , the number of links grows too rapidly with respect to the number of nodes so that the graph gets more and more dense. For this reason, we refer at this regime as the *dense* one.

## 4 Whole genome duplication-divergence model ( $q = 1$ )

The case  $q = 1$  describes the situation for which the entire genome is duplicated at each time step, corresponding to the evolution of PPI networks through whole genome duplications, as discussed in ref. [1]. All results obtained above in the general case remain valid although there are now no more “singular” genes ( $s$ ) and thus no  $\gamma_{ij}$ ’s involving them. We just summarize these results here adopting the notations of ref. [1] for the only 3 relevant  $\gamma_{ij}$ ’s left:  $\gamma_o \equiv \gamma_{oo}$ ,  $\gamma_n \equiv \gamma_{nn}$  and  $\gamma \equiv \gamma_{on}$ , hence

$$\Gamma_o = \gamma_o + \gamma, \quad \Gamma_n = \gamma_n + \gamma, \quad (\text{S19})$$

The model analysis then yields three different regimes (we do not consider the case  $\Gamma_o + \Gamma_n < 1$  for which graphs vanish)

**1. Exponential regime**  $\Gamma_o + \Gamma_n > 1$ ,  $\max(\Gamma_o, \Gamma_n) < 1$ . The limit degree distribution is nontrivial and decreases like Eq.(S13) with

$$x_0 = \begin{cases} \delta_o \delta / \gamma_o \gamma, & \Gamma_o < \Gamma_n \\ \delta_n \delta / \gamma_n \gamma, & \Gamma_o \geq \Gamma_n \end{cases} \quad (\text{S20})$$

and

$$\alpha = \frac{\ln(\Gamma_o + \Gamma_n)}{\ln(2 - \max(\Gamma_o, \Gamma_n))}, \quad \Gamma_o \neq \Gamma_n \quad (\text{S21})$$

while

$$\alpha = \frac{\ln(\Gamma_o)}{\ln(2 - \Gamma_o)}, \quad \text{for } \Gamma_o = \Gamma_n. \quad (\text{S22})$$

The rate of graph growth in number of nodes as well as in number of links is  $\Delta = \Gamma_o + \Gamma_n$

**2. Scale free regime** ( $\Gamma_o > 1$ ,  $\Gamma_n < 1$ ) or ( $\Gamma_o < 1$ ,  $\Gamma_n > 1$ ). The limit degree distribution is surely nontrivial for

$$h'(1) = \Gamma_o \ln \Gamma_o + \Gamma_n \ln \Gamma_n < 0, \quad (\text{S23})$$

and described by an asymptotic formula Eq.(S16) with  $\alpha^* > 1$  solution of

$$\Gamma_o^\alpha + \Gamma_n^\alpha = \Gamma_o + \Gamma_n, \quad (\text{S24})$$

In this case the ratio of two consecutive sizes is also  $\Delta = \Gamma_o + \Gamma_n$ . When

$$h'(1) = \Gamma_o \ln \Gamma_o + \Gamma_n \ln \Gamma_n > 0, \quad \Gamma_o \Gamma_n < 1 \quad (h'(0) < 0),$$

the mean degree distribution is still expected to converge to a nontrivial asymptotically scale-free distribution with  $0 \leq \alpha \leq 1$ .

**3. Dense regime**  $\Gamma_o \Gamma_n > 1$  (*i.e.*  $h'(0) > 0$ ). The mean degree distribution is not stationary: the growing graphs get more and more dense in the sense that the fraction of nodes with an arbitrary fixed connectivity tends to zero when  $n \rightarrow \infty$ . Almost all new nodes are kept in the duplicated graph  $\Delta = 1 + q$ .

Because all these regimes are defined in terms of two independent parameters (instead of three), the model phase diagram can be drawn in a plane  $(\Gamma_o, \Gamma_n)$ , or equivalently in  $(\Gamma_o + \Gamma_n, \Gamma_o)$  (See Fig. S2A & B). This last representation is adapted to show explicitly the domains of node conservation and graph growth, while the alternative choice  $(\Gamma_o + \Gamma_n, \Gamma_o - \Gamma_n)$  used in ref. [1] is best suited to illustrate the asymmetric divergence requirement to obtained scale-free networks (see [1] for a detailed discussion).

## 5 Local duplication-divergence limit ( $q \rightarrow 0$ )

A different limit model is obtained for  $q$  going to zero when the mean size of the graph tends to infinity, Fig. S2C. In principle, the most general model of this kind is the one defined by a monotonous decreasing function  $q(\langle N \rangle)$  with

$$\lim_{x \rightarrow \infty} q(x) = 0.$$

For any function of this type, the graph growth rate in terms of links depends essentially on  $\gamma_{ss}$  because

$$\frac{\langle L^{(n+1)} \rangle}{\langle L^{(n)} \rangle} = (1 - q)\Gamma_s + q\Gamma_o + q\Gamma_n = \gamma_{ss} + 2q(\gamma_{so} + \gamma_{sn} - \gamma_{ss}) + \mathcal{O}(q^2),$$

and if  $\gamma_{ss} < 1$  the ensemble average of graphs will never reach infinite size, it will have at most some finite dynamics. So, we will suppose that  $\gamma_{ss} = 1$ , to ensure an infinite growth. We remark also that  $\gamma_{oo}$ ,  $\gamma_{on}$  and  $\gamma_{nn}$  appear only in the term of order  $q^2$  in the last expression because two new nodes have to be kept in order to add any link of the type  $oo$ ,  $on$  or  $nn$ .



on average  $A$  nodes per step are duplicated. By setting  $\gamma_{so} = 1$  in Eq.(S26) we first get the following form for the recurrence relation,

$$\tilde{p}^{(n+1)}(x) = \frac{\tilde{p}^{(n)}(x) + q\gamma_{sn}x(x-1)\partial_x\tilde{p}^{(n)}(x) + q\tilde{p}^{(n)}(\delta_{sn} + \gamma_{sn}x)}{\Delta^{(n)}}, \quad \Delta^{(n)} = 1 - q\tilde{p}^{(n)}(\delta_{sn}), \quad (\text{S27})$$

and then using the definitions of  $\Delta^{(n)}$  and  $p^{(n)}(x)$  Eq.(4) to reexpress it as,

$$N_k^{(n+1)} = N_k^{(n)} + A\gamma_{sn}(k-1)p_{k-1}^{(n)} - A\gamma_{sn}kp_k^{(n)} + A\sum_{s \geq k} C_s^k \gamma_{sn}^k \delta_{sn}^{s-k} p_s^{(n)}, \quad (\text{S28})$$

This expression is identical to the basic recurrence relation in the model of ref. [2] for  $A = 1$ . For an arbitrary  $A$  the asymptotic properties of the growing graph are essentially the same as in ref. [2], with only the growth rate modified by a factor proportional to  $A$ .

In the more general cases for which both  $\gamma_{sn}$  and  $\gamma_{so}$  may vary (with  $\gamma_{ss} = 1$  remaining fix to ensure a non-vanishing graph), an asymptotic analysis can be carried out for the limit degree distribution with an asymptotic solution of the form

$$\tilde{p}(x) = -A_1(1-x) + A_2(1-x)^2 + A_\alpha(1-x)^\alpha + \mathcal{O}((1-x)^{\alpha+1})$$

satisfying Eq.(S26) with  $q \propto A/\langle N^{(n)} \rangle$ . The characteristic equation thus becomes,

$$h_l(\alpha) = \gamma_{so}^\alpha + \gamma_{sn}^\alpha + \alpha(\gamma_{so} + \gamma_{sn} - 1) - 1 = \varphi,$$

where  $\varphi$  is defined as

$$\varphi = \lim_{n \rightarrow \infty} \frac{(\Delta^{(n)} - 1)}{q^{(n)}} \Leftrightarrow \Delta^{(n)} \simeq 1 + q^{(n)}\varphi, \quad n \rightarrow \infty.$$

while the graph growth rate in terms of number of links is given by,

$$(1-q)\Gamma_s + q\Gamma_o + q\Gamma_n = 1 + q(2\gamma_{so} + 2\gamma_{sn} - 2) + \mathcal{O}(q^2),$$

at first order in  $q$ . Since the number of nodes can not grow more rapidly than the number of links, we can conclude that  $\varphi \leq 2\gamma_{so} + 2\gamma_{sn} - 2$ , in addition to,  $\varphi \leq 1$ , correponding to the maximum growth rate. Focussing the analysis on the case  $\gamma_{so} + \gamma_{sn} > 1$  for which the graph does not vanish, one finds that the ‘‘characteristic’’ function  $h_l(\alpha)$  is always convex, and the following results are obtained as in the asymptotic analysis of Sec. 3 in Supp. Information:

- When  $h'_l(0) < 0$  and  $h'_l(1) < 0$  the characteristic equation has a solution,  $\alpha^* > 1$ , and the limit degree distribution is asymptotically scale-free  $p_k \propto k^{-\alpha^*-1}$  with  $\alpha^*$  varying on the interval  $[1, \infty)$  (depending on parameters  $\gamma_{so}$  and  $\gamma_{sn}$ ) while  $\varphi = h_l(1)$ .
- For  $h'_l(1) = 0$  precisely, the singular term of the asymptotic solution becomes  $(1-x)\ln(1-x)$  and the limit degree distribution decreases as  $p_k \propto k^{-2}$ , for  $k \gg 1$ .
- When  $h'_l(0) < 0$  and  $h'_l(1) > 0$ , scale-free regimes with slowly decreasing degree distributions are expected in general with  $\varphi \leq \min(2\gamma_{so} + \gamma_{sn} - 2, 1)$  and the corresponding  $0 < \alpha < 1$ .
- For  $h'_l(0) > 0$  the mean degree distribution is not stationary,  $\varphi = 1$ .

Fig. S2 summarizes these results for the limit degree distribution. More generally for

$$q(\langle N \rangle) = \frac{A}{\langle N \rangle^\beta}, \quad A > 0, \quad \beta > 0,$$

when  $\beta > 1$ , nodes are rarely duplicated so that the interval between two successful duplications in number of steps is approximately

$$n \propto \langle N^{(n)} \rangle^{\beta-1}.$$

Therefore  $\beta > 1$  gives a model equivalent to  $\beta = 1$  with a change of time scale. On the other hand, for  $0 < \beta < 1$  a set of nontrivial models is obtained.

## 6 General Duplication-Divergence models including self-interacting proteins

One type of interactions, which is not included in the main GDD model, Fig. 1 and Eq. 2, corresponds to self-interacting loops, Fig. S3. Although self-link loops exist and might have played a critical role in the actual emergence of molecular interaction networks during early evolutionary times, they can be shown to have very little effects on the long time scale evolution of PPI networks under GDD model dynamics, which is why we have omitted them for simplicity in the main text.



Actually, the possibility of protein homo-oligomerization can be explicitly taken into account by introducing 2 types of nodes corresponding respectively to *i*) self-interacting proteins with self-link loops and *ii*) non-self-interacting proteins without self-link loops, Fig. S3. Available data on PPI networks reveals that about 10 to 15% of interacting proteins are self-interacting [5]. In principle, the detailed evolution of PPI network conservation and topology is affected by self-link loops which provide a source of duplication-derived *de novo* interactions between “old” and “new” copies of duplicated self-interacting proteins. We introduce four new evolutionary parameters,  $\mu_s$ ,  $\mu_o$ ,  $\mu_n$  and  $\mu_{on}$ , corresponding, respectively, to the probability to conserve a self-link interaction on a “singular” gene, “old” or “new” duplicated genes or to retain the duplication-derived *de novo* interaction between an old and new pair of gene copies from a duplicated self-interacting genes, Fig. S3. Together with previous “ $1q+6\gamma$ ” evolutionary parameters this defines an *homogeneous* “ $1q+6\gamma+4\mu$ ” GDD model where all  $\gamma$ 's are independent from the self-interacting or non-self-interacting nature of each protein partner.

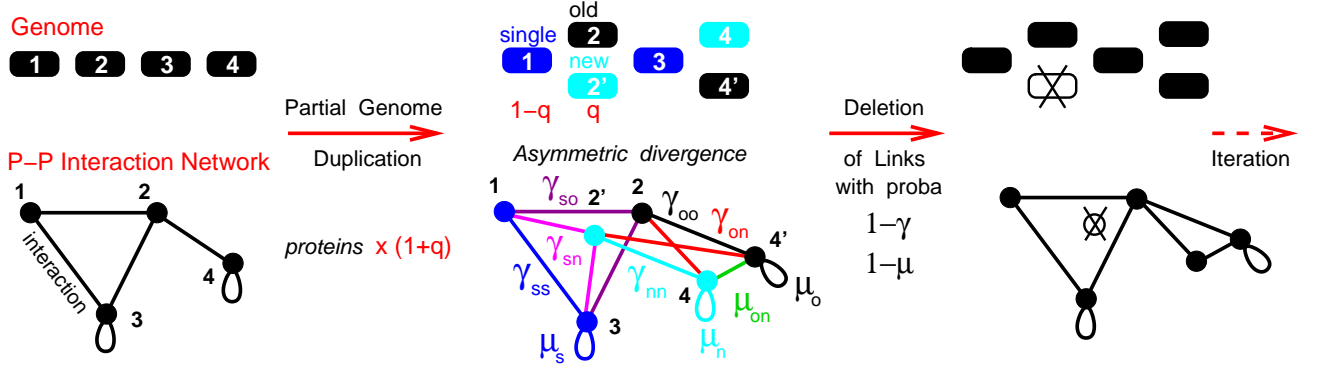

Figure S3: **GDD model of PPI network evolution including *self-link* interactions** (“ $1q+6\gamma+4\mu$ ” parameters).

From a theoretical perspective, we now have to solve two coupled functional recurrences for the generating functions,  $F_\ell^{(n)}(x)$  and  $F_{n\ell}^{(n)}(x)$ , respectively, with and without self-link loops. The global generation function including all network nodes is then simply  $F^{(n)}(x) = F_\ell^{(n)}(x) + F_{n\ell}^{(n)}(x)$ .

Hence, we readily obtain, using the same notation as before, in addition to the self-link “ $\mu$ ” parameters,

- Generating function WGD recurrence for the self-link loops,  $F_\ell^{(n)}(x)$ :

$$F_\ell^{(n+1)}(x) = (1-q)\mu_s F_\ell^{(n)}(A_s(x)) + q(\mu_{on}x + 1 - \mu_{on}) \left[ \mu_o F_\ell^{(n)}(A_o(x)) + \mu_n F_\ell^{(n)}(A_n(x)) \right], \quad (S29)$$

- Generating function WGD recurrence without self-link loops,  $F_{n\ell}^{(n)}(x)$ :

$$F_{n\ell}^{(n+1)}(x) = (1-q) \left[ F_{n\ell}^{(n)}(A_s(x)) + (1-\mu_s) F_\ell^{(n)}(A_s(x)) \right] + q \left[ F_{n\ell}^{(n)}(A_o(x)) + F_{n\ell}^{(n)}(A_n(x)) \right] + q(\mu_{on}x + 1 - \mu_{on}) \left[ (1-\mu_o) F_\ell^{(n)}(A_o(x)) + (1-\mu_n) F_\ell^{(n)}(A_n(x)) \right] \quad (S30)$$

- And the global generating function including all network nodes,  $F^{(n)}(x) = F_\ell^{(n)}(x) + F_{n\ell}^{(n)}(x)$ :

$$F^{(n+1)}(x) = (1-q)F^{(n)}(A_s(x)) + q \left[ F^{(n)}(A_o(x)) + F^{(n)}(A_n(x)) \right] + q\mu_{on}(x-1) \left[ F_\ell^{(n)}(A_o(x)) + F_\ell^{(n)}(A_n(x)) \right] \quad (S31)$$

Note, in particular, that,

- *i*) the evolution of self-link loops,  $F_\ell^{(n)}(x)$ , is not coupled to non-self-interacting proteins,  $F_{n\ell}^{(n)}(x)$ , while the global network evolution,  $F^{(n)}(x)$ , is formally different from Eq.(2) if and only if  $\mu_{on} \neq 0$ .
- *ii*) the existence of self-link loops in the PPI network does *not* affect the arguments of *any* generating functions, leading instead to self-link-dependent prefactors in all three generating function recurrences. This implies that the leading term of successive derivatives at  $x = 1$  of these generating functions involve successive powers  $\Gamma_i^k$ ,  $k \geq 1$  where  $\Gamma_i = \partial_x A_i|_{x=1}$ , for  $i = s, o, n$ , as before.

Hence, applying the same asymptotic method approach as described in the main text readily yields the following asymptotic regimes for *i*) self-interacting proteins and *ii*) global PPI network,

- *i*) we always have  $\Delta_\ell = (1-q)\mu_s + q(\mu_o + \mu_n)$ , for the exponential growth rate of the number of self-link loops, and for scale-free regimes,  $M' = \max_i(\Gamma_i) > 1$ ,  $\Delta_\ell = (1-q)\mu_s + q(\mu_o + \mu_n) = (1-q)\mu_s \Gamma_s^{\alpha_\ell} + q[\mu_o \Gamma_o^{\alpha_\ell} + \mu_n \Gamma_n^{\alpha_\ell}]$ , which defines the power law exponent,  $\alpha_\ell$ , for the limit degree distribution of self-interacting proteins,  $p_{\ell k} \propto k^{-\alpha_\ell-1}$ ,  $k \gg 1$ .

• *ii*) there are two cases for the global network topology in linear regimes, which we only consider here (*i.e.* same network growth rates in terms of node or link numbers, see main text):

1- either  $\Delta_\ell = (1-q)\mu_s + q(\mu_o + \mu_n) < (1-q)\Gamma_s + q[\Gamma_o + \Gamma_n] = \Delta = (1-q)\Gamma_s^\alpha + q[\Gamma_o^\alpha + \Gamma_n^\alpha]$ , then the network growth rate  $\Delta$  is dominated by non-self-interacting proteins, which implies a negligible effect of self-link loops and no changes from the paper conclusions, in particular  $\alpha = \alpha_{n\ell}$ , corresponding to the scale-free exponent without self-link loops defined as  $(1-q)\Gamma_s + q[\Gamma_o + \Gamma_n] = (1-q)\Gamma_s^{\alpha_{n\ell}} + q[\Gamma_o^{\alpha_{n\ell}} + \Gamma_n^{\alpha_{n\ell}}]$  as in main text.

2- or  $\Delta_\ell = (1-q)\mu_s + q(\mu_o + \mu_n) = \Delta = (1-q)\Gamma_s^\alpha + q[\Gamma_o^\alpha + \Gamma_n^\alpha] > (1-q)\Gamma_s + q[\Gamma_o + \Gamma_n] = (1-q)\Gamma_s^{\alpha_{n\ell}} + q[\Gamma_o^{\alpha_{n\ell}} + \Gamma_n^{\alpha_{n\ell}}]$ , and the network growth rate  $\Delta$  is then dominated by self-interacting proteins, which implies some non negligible effects of self-link loops but actually *no changes* from the paper main conclusions on network conservation and topological regimes, except for the precise value of the power law exponent  $\alpha$  in scale-free regimes, which increases from  $\alpha = \alpha_{n\ell}$  to  $\alpha_{n\ell} < \alpha < \alpha_\ell$ . Note, however, that self-interacting proteins exhibit a larger connectivity exponent  $\alpha_\ell$  than the global PPI network,  $\alpha < \alpha_\ell$ .

Hence, overall, the general conservation and topological properties of PPI networks is actually little affected by the presence of self-link loops, in the asymptotic limits of large PPI networks and large node degrees. As can be seen from the above argument, this is because conservation and topological properties of PPI networks are controlled by the *exponential* increase of their node degrees,  $k \rightarrow k\Gamma_i$ , for  $i = s, o, n$ , while the contribution of *de novo* interactions arising from duplicated self-interacting proteins can at most lead to a *linear* increase of node degrees, with a maximum increment of +1 link per duplication event and protein. Thus, although an abundance of self-interacting proteins can significantly affect the evolution of low connectivity proteins, it cannot lead to a change of topological regimes for the highly connected nodes of the PPI networks (*e.g.* from exponential to scale-free node degree distribution or vice versa). Hence, to a first approximation, self-interacting proteins can be simply ignored to establish the asymptotic conservation and topology regimes of PPI network evolution, as we have done in the main text

Note, however, that self-link loops might still be important for the evolution of certain network motifs whose initial emergence might precisely depend on the presence of self-interacting proteins (*e.g.* the triangle motif unless one triangle at least is already present in the initial network).

## 7 General duplication-divergence hybrid models

We start the analysis of GDD hybrid models with the case of *two* duplication-divergence steps involving some fractions  $q_1$  and  $q_2$  of duplicated genes, introducing explicit dependencies in  $q$  and  $x$  for  $A_i(q, x)$  and  $\Gamma_i(q) = \partial_x A_i(q, 1)$  functions ( $i = s, o, n$ ),  $A_i(q, x) = (1-q)(\gamma_{is}x + \delta_{is}) + q(\gamma_{io}x + \delta_{io})(\gamma_{in}x + \delta_{in})$  and  $\Gamma_i(q) = (1-q)\gamma_{is} + q(\gamma_{io} + \gamma_{in})$ .

An evolutionary recurrence for the hybrid generating function can be found by introducing the intermediate step explicitly,  $\tilde{p}^{(n)} \rightarrow \tilde{r}^{(n)} \rightarrow \tilde{p}^{(n+1)}$  where,

$$\tilde{r}^{(n)}(x) = \frac{(1-q_1)\tilde{p}^{(n)}(A_s(q_1, x)) + q_1\tilde{p}^{(n)}(A_o(q_1, x)) + q_1\tilde{p}^{(n)}(A_n(q_1, x))}{\Delta_1^{(n)}}$$

$$\Delta_1^{(n)} = -(1-q_1)\tilde{p}^{(n)}(A_s(q_1, 0)) - q_1\tilde{p}^{(n)}(A_o(q_1, 0)) - q_1\tilde{p}^{(n)}(A_n(q_1, 0)) > 0,$$

and then  $\tilde{r}^{(n)} \rightarrow \tilde{p}^{(n+1)}$  with,

$$\tilde{p}^{(n+1)}(x) = \frac{(1-q_2)\tilde{r}^{(n)}(A_s(q_2, x)) + q_2\tilde{r}^{(n)}(A_o(q_2, x)) + q_2\tilde{r}^{(n)}(A_n(q_2, x))}{\Delta_2^{(n)}}$$

$$\Delta_2^{(n)} = -(1-q_2)\tilde{r}^{(n)}(A_s(q_2, 0)) - q_2\tilde{r}^{(n)}(A_o(q_2, 0)) - q_2\tilde{r}^{(n)}(A_n(q_2, 0)) > 0,$$

which finally yields for the effective  $\tilde{p}^{(n)} \rightarrow \tilde{p}^{(n+1)}$  step,

$$\tilde{p}^{(n+1)}(x) = \frac{(1-q_2)\left((1-q_1)\tilde{p}^{(n)}(A_s(q_1, A_s(q_2, x))) + q_1\tilde{p}^{(n)}(A_o(q_1, A_s(q_2, x))) + q_1\tilde{p}^{(n)}(A_n(q_1, A_s(q_2, x)))\right)}{\Delta_1^{(n)}\Delta_2^{(n)}}$$

$$+ \frac{q_2\left((1-q_1)\tilde{p}^{(n)}(A_s(q_1, A_o(q_2, x))) + q_1\tilde{p}^{(n)}(A_o(q_1, A_o(q_2, x))) + q_1\tilde{p}^{(n)}(A_n(q_1, A_o(q_2, x)))\right)}{\Delta_1^{(n)}\Delta_2^{(n)}}$$

$$+ \frac{q_2\left((1-q_1)\tilde{p}^{(n)}(A_s(q_1, A_n(q_2, x))) + q_1\tilde{p}^{(n)}(A_o(q_1, A_n(q_2, x))) + q_1\tilde{p}^{(n)}(A_n(q_1, A_n(q_2, x)))\right)}{\Delta_1^{(n)}\Delta_2^{(n)}}$$

Expressing successive derivatives at  $x = 1$ ,  $\partial_x^k p(1)$ , for  $k \geq 2$  in the asymptotic limit  $p^{(n)}(x) \rightarrow p(x)$  and  $\Delta_1^{(n)} \Delta_2^{(n)} \rightarrow \Delta^2$  for  $n \rightarrow \infty$ , yields,  $\partial_x^k p(1) = (1-q_2)(1-q_1)\Gamma_s^k(q_2)\Gamma_s^k(q_1)\partial_x^k p(1) + (1-q_2)q_1\Gamma_s^k(q_2)\Gamma_o^k(q_1)\partial_x^k p(1) + \dots$  and hence,

$$\partial_x^k p(1) \left[ 1 - \frac{\left( (1-q_1)\Gamma_s^k(q_1) + q_1\Gamma_o^k(q_1) + q_1\Gamma_n^k(q_1) \right) \left( (1-q_2)\Gamma_s^k(q_2) + q_2\Gamma_o^k(q_2) + q_2\Gamma_n^k(q_2) \right)}{\Delta^2} \right] = \sum_{l=[k/2]}^k \alpha_{k,l} \partial_x^l p(1), \quad (\text{S32})$$

In fact, this simple duplication-divergence combination can be generalized to *any* duplication-divergence hybrid models with arbitrary series of the 1+6 microscopic parameters  $\{q^{(n)}, \gamma_{ij}^{(n)}\}_R \in [0, 1]$ , for  $i, j = s, o, n$  and  $1 \leq n \leq R$ . Each duplication-divergence step then corresponds to a different linear operator  $\mathcal{M}^{(n)}$  defined by  $q^{(n)}$  and the functional arguments  $A_i^{(n)}(q^{(n)}, x) = (1-q^{(n)})(\gamma_{is}^{(n)}x + \delta_{is}^{(n)}) + q^{(n)}(\gamma_{io}^{(n)}x + \delta_{io}^{(n)})(\gamma_{in}^{(n)}x + \delta_{in}^{(n)})$  and  $\Gamma_i^{(n)} = \partial_x A_i^{(n)}(q^{(n)}, 1)$  for  $i = s, o, n$  (with  $A_i^{(n)}(q^{(n)}, 1) = 1$ ). Hence, applying the same reasoning as in *Asymptotic methods* to the series of linear operators  $\{\mathcal{M}^{(n)}\}_R$  implies that *any* duplication-divergence hybrid model converges in the asymptotic limit (at least for simple initial conditions).

In the following, we first assume that the evolutionary dynamics remains cyclic with a finite period  $R$ , before discussing at the end the  $R \rightarrow \infty$  limit, which can ultimately include intrinsic stochastic fluctuations of the microscopic parameters.

In the cyclic case with a finite period  $R$ , successive derivatives at  $x = 1$ ,  $\partial_x^k p(1)$ , can be expressed in the asymptotic limit,  $p^{(n)}(x) \rightarrow p(x)$  as,

$$\partial_x^k p(1) \left( 1 - \frac{\prod_n^R \left[ (1-q^{(n)})\Gamma_s^{(n)k} + q^{(n)}\Gamma_o^{(n)k} + q^{(n)}\Gamma_n^{(n)k} \right]}{\Delta^R} \right) = \sum_{l=[k/2]}^k \alpha_{k,l} \partial_x^l p(1), \quad (\text{S33})$$

Network conservation for such general duplication-divergence hybrid model corresponds to the condition  $M > 1$ , where the *conservation index*  $M$  now reads

$$M = \left( \prod_n^R \left[ (1-q^{(n)})\Gamma_s^{(n)} + q^{(n)}\Gamma_o^{(n)} \right] \right)^{1/R} \quad (\text{S34})$$

while the nature of the asymptotic degree distribution is controlled by the network *topology index*,

$$M' = \left( \prod_n^R \max_i \left( \Gamma_i^{(n)} \right) \right)^{1/R} \quad (\text{S35})$$

with  $M' < 1$  corresponding to exponential networks and  $M' > 1$  to scale-free (or dense) networks with an effective node degree exponent  $\alpha$  and effective node growth rate  $\Delta$  that are self-consistent solutions of the generalized characteristic equation,

$$h(\alpha) = \left( \prod_n^R h^{(n)}(\alpha, q^{(n)}) \right)^{1/R} = \Delta \quad (\text{S36})$$

The resolution of this generalized characteristic equation is done following *exactly* the same discussion for singular regimes as with constant  $q$  and  $\Gamma_i$  (Fig. 3 and main text) due to the convexity of the generalized  $h(\alpha)$  function,  $\partial_\alpha^2 h(\alpha) \geq 0$ . Indeed, the first two derivatives of  $h(\alpha)$  yield (with implicit dependency in successive duplication-divergence steps,  $q \equiv q^{(n)}$ ,  $\Gamma_i \equiv \Gamma_i^{(n)}$ , etc, for  $i = s, o, n$ ),

$$\begin{aligned} \partial_\alpha h(\alpha) &= \left( \prod_n^R h(\alpha, q) \right)^{1/R} \frac{1}{R} \sum_n^R \frac{\partial_\alpha h(\alpha, q)}{h(\alpha, q)} \\ &= \left( \prod_n^R h(\alpha, q) \right)^{1/R} \frac{1}{R} \sum_n^R \frac{(1-q)\Gamma_s^\alpha \ln \Gamma_s + q\Gamma_o^\alpha \ln \Gamma_o + q\Gamma_n^\alpha \ln \Gamma_n}{(1-q)\Gamma_s^\alpha + q\Gamma_o^\alpha + q\Gamma_n^\alpha} \\ \partial_\alpha^2 h(\alpha) &= \left[ \frac{1}{R} \sum_n^R \frac{(1-q)q\Gamma_s^\alpha \Gamma_o^\alpha (\ln \Gamma_s - \ln \Gamma_o)^2 + (1-q)q\Gamma_s^\alpha \Gamma_n^\alpha (\ln \Gamma_s - \ln \Gamma_n)^2 + q^2 \Gamma_o^\alpha \Gamma_n^\alpha (\ln \Gamma_o - \ln \Gamma_n)^2}{h^2(\alpha, q)} \right. \\ &\quad \left. + \left( \frac{1}{R} \sum_n^R \frac{\partial_\alpha h(\alpha, q)}{h(\alpha, q)} \right)^2 \right] \left( \prod_n^R h(\alpha, q) \right)^{1/R} \geq 0 \end{aligned}$$

Let us now show that the solution of the generalized characteristic equation corresponding to  $\alpha = 1$  implies  $h'(1) = 0$ , which is an essential condition to prove the existence of scale-free asymptotic regimes with a unique power law exponent,  $p_k \propto k^{-\alpha^* - 1}$ , with  $\alpha^* > 1$  (see main text).

The generalized functional equation defining the limit degree distribution for a GDD hybrid model with an arbitrary sequence of duplications contains a sum over  $3^R$  terms with  $R$  times nested functional arguments,

$$\tilde{p}(x) = \frac{1}{\Delta^R} \sum_I c_I \cdot \underbrace{\tilde{p}(A_{i_1}^{(1)}(q^{(1)}, A_{i_2}^{(2)}(q^{(2)}, A_{i_3}^{(3)}(q^{(3)}, \dots, A_{i_R}^{(R)}(q^{(R)}, x))))}_{R \text{ times}}$$

with all possible  $i_j = s, o, n$  for  $1 \leq j \leq R$ , and a prefactor  $c_I$  for  $I = \{i_1, \dots, i_R\}$  equal to a product of  $(1 - q^{(j)})$  or  $q^{(j)}$  corresponding to each occurrence of  $A_s^{(j)}(q^{(j)}, \dots)$  or  $A_{o,n}^{(j)}(q^{(j)}, \dots)$ , respectively, within the nested functional argument. Inserting the expansion ansatz for  $\alpha = 1$  near  $x = 1$ ,

$$\tilde{p}(x) = -a_1(1-x) - a'(1-x)\ln(1-x) + \mathcal{O}((1-x)^2\ln(1-x))$$

in the general functional equation yields the following form for each of the  $3^R$  terms  $\tilde{p}(\mathcal{A}_I(x))$  of the functional sum (where  $\mathcal{A}_I(x)$  is the nested functional argument),

$$\begin{aligned} \tilde{p}(\mathcal{A}_I(x)) \rightarrow & -a_1(1 - \mathcal{A}_I(x)) - a'(1 - \mathcal{A}_I(x))\ln(1 - \mathcal{A}_I(x)) = \\ & -a_1\mathcal{A}'_I(1)(1-x) - a'\mathcal{A}'_I(1)\ln\mathcal{A}'_I(1)(1-x) - a'\mathcal{A}'_I(1)(1-x)\ln(1-x) + \mathcal{O}((1-x)^2\ln(1-x)). \end{aligned}$$

where,

$$\mathcal{A}'_I(1) = \prod_n^R \partial_x A_{i_n}^{(n)}(q^{(n)}, 1) = \prod_n^R \Gamma_{i_n}^{(n)}, \quad \text{and} \quad \sum_I c_I \mathcal{A}'_I(1) = [h(1)]^R$$

Hence, after collecting all  $3^R$  terms together we get for the functional equation,

$$\tilde{p}(x) = -a'(1-x)\frac{1}{\Delta^R} \sum_I c_I \mathcal{A}'_I(1) \ln \mathcal{A}'_I(1) - a_1 \left(\frac{h(1)}{\Delta}\right)^R (1-x) - a' \left(\frac{h(1)}{\Delta}\right)^R (1-x)\ln(1-x).$$

As the solution  $\alpha = 1$  implies  $\Delta = h(1)$ , the last two terms on the right side of the functional equation correspond exactly to the expansion ansatz of  $\tilde{p}(x)$  near  $x = 1$  for  $\alpha = 1$ , implying that the first term must vanish (with  $a' \neq 0$ ). This imposes the supplementary condition,

$$\sum_I c_I \mathcal{A}'_I(1) \ln \mathcal{A}'_I(1) = 0$$

which is in fact equivalent to  $h'(1) = 0$ .

Finally, let us discuss the case of infinite, *non-cyclic series* of duplication-divergence events, which can include intrinsic stochastic fluctuations of all microscopic parameters. Formally, analyzing non-cyclic, instead of cyclic, infinite duplication-divergence series implies to exchange the orders for taking the two limits  $p^{(n)}(x) \rightarrow p(x)$  and  $R \rightarrow \infty$  (with  $1 \leq n \leq R$ ). Although this cannot be done directly with the present approach, either double limit order should be equivalent, when there is a *unique* asymptotic form independent from the initial conditions (and convergence path). We know from the previous analysis that it is indeed the case for the *linear* evolutionary regimes (with  $h(1) = \Delta$ ) leading to exponential or scale-free asymptotic distributions (with a unique  $\alpha^* \geq 1$ ). Hence, the main conclusions for biologically relevant regimes of the GDD model are insensitive to stochastic fluctuations of microscopic parameters.

On the other hand, when the asymptotic limit is *not* unique, as might be the case for *non-linear* evolutionary regimes, the order for taking the double limit  $p^{(n)}(x) \rightarrow p(x)$  and  $R \rightarrow \infty$  (with  $1 \leq n \leq R$ ) might actually affect the asymptotic limit itself. Still, asymptotic convergence remains granted in both limit order cases (see above) and we do not expect that the general scale-free form of the asymptotic degree distribution radically changes. Moreover, numerical simulations seem in fact to indicate the existence of a unique limit form (at least in some *non-linear* evolutionary regimes) but after extremely slow convergence, see *Numerical simulations* below. Yet, the unicity of the asymptotic form of the GDD model for *general non-linear* evolutionary regimes remains an open question.

### Combining local and global duplications

We now outline the predictions for a realistic GDD model combining  $R-1 \gg 1$  local duplications ( $q \ll 1$ ) for each whole genome duplication ( $q = 1$ ). This hybrid model of PPI network evolution amounts to a simple extension of the initial GDD model with fixed  $q$ .

Network conservation is now controlled by the cumulated product of connectivity growth/decrease rates over one whole genome duplication and  $R-1$  local duplications, following the most conserved, ‘‘old’’ duplicate lineage,

$$M = \left( \Gamma_o(1) \cdot [(1-q)\Gamma_s(q) + q\Gamma_o(q)]^{R-1} \right)^{1/R} \quad (\text{S37})$$

where we note the explicit dependence of  $\Gamma_i$  in  $q$  ( $i = s, o, n$ ):  $\Gamma_i(q) = (1-q)\gamma_{is} + q(\gamma_{io} + \gamma_{in})$ . Hence, conserved [resp. non-conserved] networks correspond to  $M > 1$  [resp.  $M < 1$ ].

A similar cumulated product also controls the effective node degree exponent  $\alpha$  and node growth rate  $\Delta$  which are self-consistent solutions of the characteristic equation,

$$\left( h(\alpha, 1) \cdot [h(\alpha, q)]^{R-1} \right)^{1/R} = \Delta \quad (\text{S38})$$

where we note the explicit dependence of function  $h(\cdot)$  for  $\alpha$  and  $q$ :  $h(\alpha, q) = (1-q)\Gamma_s^\alpha(q) + q\Gamma_o^\alpha(q) + q\Gamma_n^\alpha(q)$  as before.

Hence, the asymptotic degree distribution for the hybrid model is controlled by the averaged *topology index*,

$$M' = \left( \Gamma_o(1) \cdot \max_i (\Gamma_i^{R-1}(q)) \right)^{1/R} \quad (\text{S39})$$

with  $M' > 1$  [resp.  $M' < 1$ ] for scale-free (or dense) [resp. exponential] limit degree distribution. In particular, assuming  $\Gamma_s(q) \geq \Gamma_o(q)$ , we find  $M'^R = \Gamma_o(1)\Gamma_s^{R-1}(q)$  and thus,

$$\begin{aligned} M'^R &= \Gamma_o(1) \cdot \gamma_{ss}^{R-1} \left( 1 + q \left( \frac{\gamma_{so} + \gamma_{sn}}{\gamma_{ss}} - 1 \right) \right)^{R-1} \\ &\simeq \Gamma_o(1) \sqrt{[h(1, q)]^{R-1}} \quad \text{for } \gamma_{ss} = 1, \quad Rq^2 \ll 1 \end{aligned}$$

The square root dependency in terms of cumulated growth rate by  $R-1$  local duplications,  $[h(1, q)]^{R-1}$ , implies that non-conserved, exponential regimes for whole genome duplications (if  $\Gamma_o(1) < 1$ ) are not easily compensated by local duplications, suggesting that *asymmetric* divergence between duplicates is still required, in practice, to obtain (conserved) scale-free networks. In this case, the asymptotic exponent of the hybrid model  $\alpha_h$  lies between those for purely local ( $\alpha_\ell$ ) and purely global ( $\alpha_g$ ) duplications, that are solution of  $h(\alpha_\ell, q) = \Delta_\ell$  and  $h(\alpha_g, 1) = \Delta_g$ , with typical scale-free exponents  $\alpha_\ell + 1$ ,  $\alpha_g + 1$  and, hence,  $\alpha_h + 1 \in [2, 3]$ , for  $\bar{k} < \infty$ . Analysis of available PPI data is discussed in [1].

## 8 Non-local properties of GDD Models

The approach, based on generating functions we have developed to study the evolution of the mean degree distribution can also be applied to study the evolution of simple non-local motifs in the networks. Here, we consider two types of motifs: the two-node motif,  $N_{k,l}^{(n)}$  (Fig. S4B), that contains information about the correlations of connectivities between nearest neighbors, and the three-node motif,  $T_{k,l,m}^{(n)}$  (Fig. S4C), describing connectivity correlations within a triangular motif. Two generating functions can be defined for the average numbers of each one of these simple motifs,

$$H^{(n)}(x, y) = \sum_{k \geq 0, l \geq 0} \langle N_{k,l}^{(n)} \rangle x^k y^l, \quad (\text{S40})$$

$$T^{(n)}(x, y, z) = \sum_{k \geq 0, l \geq 0, m \geq 0} \langle T_{k,l,m}^{(n)} \rangle x^k y^l z^m. \quad (\text{S41})$$

By construction these functions are symmetric with respect to circular permutations of their arguments.

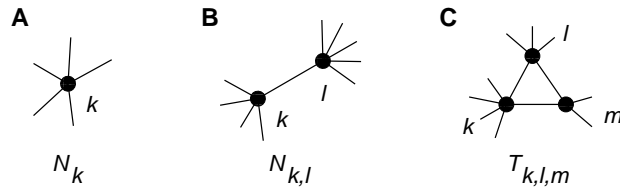

Figure S4: Simple correlation motifs in PPI networks.

By definition and symmetry properties of these generating functions, one obtains the mean number of links  $\langle L^{(n)} \rangle$  or triangles  $\langle T^{(n)} \rangle$ , by setting all arguments to one,

$$\begin{aligned} H^{(n)}(x=1, y=1) &= 2\langle L^{(n)} \rangle, \\ T^{(n)}(x=1, y=1, z=1) &= 6\langle T^{(n)} \rangle, \end{aligned}$$

Hence, we can appropriately normalize these generating functions as,

$$h^{(n)}(x, y) = \sum_{k \geq 0, l \geq 0} \frac{\langle N_{k,l}^{(n)} \rangle}{2\langle L^{(n)} \rangle} x^k y^l, \quad (\text{S42})$$

$$t^{(n)}(x, y, z) = \sum_{k \geq 0, l \geq 0, m \geq 0} \frac{\langle T_{k,l,m}^{(n)} \rangle}{6\langle T^{(n)} \rangle} x^k y^l z^m \quad (\text{S43})$$

which yields two rescaled generating functions, varying from zero to one, for the two motif distributions.

Linear recurrence relations can then be written for these generating functions  $H^{(n)}$ ,  $T^{(n)}$ ,  $h^{(n)}$  and  $t^{(n)}$ , using the same approach as for the evolutionary recurrence Eq.(S2) (see Appendix B for details). These relations which contain all information on 2- and 3-node motif correlations, can also be used to deduce simpler and more familiar quantities, such as the average connectivity of neighbors [4,6],  $g(k)$ , and the clustering coefficient [7,8],  $C(k)$ .

$g(k)$  is defined on a particular network realization as,

$$g(k) = \sum_{i:d_i=k} \sum_{j \in \langle i \rangle} d_j / k N_k,$$

where  $d_i$  denotes the connectivity of node  $i$ . This can be expressed in terms of the two-node motif of Fig. S4B and averaged over all trajectories of the stochastic network evolution after  $n$  duplications as,

$$g^{(n)}(k) = \left\langle \frac{\sum_{l \geq 0} (l+1) N_{k-1,l}^{(n)}}{k N_k^{(n)}} \right\rangle \simeq \frac{\sum_{l \geq 0} (l+1) \langle N_{k-1,l}^{(n)} \rangle}{k \langle N_k^{(n)} \rangle}, \quad (\text{S44})$$

where the average of ratios can be replaced, in the asymptotic limit  $n \rightarrow \infty$ , by the ratio of averages for *linear* growth regimes, for which fluctuations of  $N_k^{(n)}$  do not diverge (see section on *Statistical properties of GDD models*). Note, however, that this requires  $N_k^{(n)} \gg 1$  which excludes by definition the few most connected nodes (or ‘‘hubs’’,  $k \geq k_h$ ) for which  $\langle N_k^{(n)} \rangle \leq 1$  (See section on *Numerical simulations*, below).

With this asymptotic approximation ( $k \leq k_h$ ),  $g^{(n)}(k)$  can then be expressed in terms of  $h^{(n)}(x, y)$  and its derivatives,

$$g^{(n)}(k) = \frac{\partial_x^{k-1} h_1^{(n)}(x)|_{x=0}}{\partial_x^{k-1} h_0^{(n)}(x)|_{x=0}} + 1 \quad (\text{S45})$$

where  $h_1^{(n)}(x) = \partial_y h^{(n)}(x, y)|_{y=1}$ , and  $h_0^{(n)}(x) = h^{(n)}(x, y=1)$ . Hence, we can reduce the recurrence relation on  $h^{(n)}(x, y)$  to two recurrence relations on single variable functions  $h_1^{(n)}(x)$  and  $h_0^{(n)}(x)$  with,

$$h_0^{(n)}(x) = (\bar{k}^{(n)})^{-1} \partial_x p^{(n)}(x)$$

using the mean distribution function defined in Eq.(4).

By construction  $g(k)$  reflects correlations between connectivities of neighbor nodes and can actually be related to the conditional probability  $p(k'|k)$  to find a node of connectivity  $k'$  as a nearest neighbor of a node with connectivity  $k$

$$p(k'|k) = \frac{N_{k-1,k'-1}}{k N_k}, \quad g(k) = \sum_{k'} p(k'|k) k'$$

It is important to stress that  $g^{(n)}(k)$  defined in this way might be non-stationary even though a stationary degree distribution may exist. Indeed, by definition  $g^{(n)}(k)$  satisfies the following normalization condition,

$$\bar{k}^2^{(n)} = \sum_k k^2 p_k^{(n)} = \sum_k k g^{(n)}(k) p_k^{(n)}. \quad (\text{S46})$$

which implies that  $g^{(n)}(k)$  should diverge whenever  $\bar{k}^2^{(n)}$  does so (and  $\bar{k}^{(n)} \rightarrow \bar{k} < \infty$ ). This is in particular the case for actual PPI networks with scale-free degree distribution  $p_k \propto k^{-\alpha-1}$  with  $2 < \alpha + 1 \leq 3$ . When comparing actual PPI network data with GDD models (as discussed in ref. [1]), we have found that such divergence can be appropriately rescaled by the factor  $\bar{k}^{(n)} / \bar{k}^2^{(n)}$ , which yields quasi-stationary rescaled distributions  $\bar{k}^{(n)} g^{(n)}(k) / \bar{k}^2^{(n)}$  (see *Numerical Simulations*).

The clustering coefficient,  $C(k)$ , is traditionally defined as the ratio between the mean number of triangles passing by a node of connectivity  $k$  and  $k(k-1)/2$ , the maximum possible number of triangles around this node. When replacing the mean of ratios by the ratio of means in the asymptotic limit, as above, we can express  $C^{(n)}(k)$  as,

$$C^{(n)}(k) = \frac{\sum_{l \geq 0, m \geq 0} \langle T_{(k-2,l,m)}^{(n)} \rangle}{k(k-1) \langle N_k^{(n)} \rangle}. \quad (\text{S47})$$

Hence, this distribution is entirely determined by the following two generating functions  $p^{(n)}(x)$  and  $t_0^{(n)}(x) = t^{(n)}(x, 1, 1)$

$$C^{(n)}(k) = \frac{6 \langle T^{(n)} \rangle}{k(k-1) \langle N^{(n)} \rangle} \frac{\partial_x^{k-2} t_0^{(n)}(x)|_{x=0}}{\partial_x^k p^{(n)}(x)|_{x=0}}, \quad (\text{S48})$$

where  $6 \langle T^{(n)} \rangle = t_0^{(n)}(1)$ . A self-consistent recurrence relation on  $t_0^{(n)}(x)$  can be deduce from the general recurrence relation on  $T^{(n)}(x, y, z)$ . We postpone the detailed analysis of these quantities to futur publications.

## 9 Numerical simulations – GDD model convergence *versus* Empirical network data

We present in this section some numerical results which illustrate the main predicted regimes of the GDD model. The most direct way to study numerically PPI network evolution according to the GDD model is to simulate the local evolutionary rules on a graph defined, for example, as a collection of links. This kind of simulation gives access to all observables associated with the graph, while requiring a memory space and a number of operations per duplication step roughly proportional to the number of links. On the other hand, if we are interested in node degree distribution only, a simpler and faster numerical approach can be used: instead of detailing the set of links explicitly, one can solely monitor the information concerning the collection of connectivities of the graph, ignoring correlations between connected nodes. At each duplication-divergence step, a fraction  $q$  of nodes from the current node degree distribution is duplicated and yields two duplicate copies (“old” and “new”) while the complementary  $1 - q$  fraction remains “singular”. Duplication-derived interactions are then deleted assuming a random distribution of old/new vs singular neighbor nodes with probability  $q$  vs  $1 - q$ . The evolution of the connectivity distribution derived in this way corresponds exactly to the evolution of the average degree distribution; even though particular realizations are different, we obtain on average the correct mean degree distribution. This simulation only requires a memory space proportional to the maximum connectivity and a number of operation that is still proportional to the number of links. Since the number of links grows exponentially more rapidly than the maximum connectivity, this numerical approach provides an efficient alternative to perform large numbers of duplications as compared with direct simulations. The numerical results presented below are obtained using either approach and correspond only to a few parameter choices of the GDD model in the whole genome duplication-divergence limit ( $q = 1$ ). These examples capture, however, the main features of every network evolution regimes.

### From scale-free to dense regimes

We first present results for the most asymmetric whole genome duplication-divergence model [1]  $q = 1$ ,  $\gamma_{oo} = 1$  and  $\gamma_{nn} = 0$  for four values of the only remaining variable parameter  $\gamma_{on} = \gamma = 0.1, 0.26, 0.5$  and  $0.7$ , Figs. S5A&B. As summarized on the general phase diagram for  $q = 1$ , Fig. S2B, this model does not present any exponential regime, but a scale-free limit degree distribution  $p_k \sim k^{-\alpha^* - 1}$  with a unique  $\alpha^*$  satisfying

$$(1 + \gamma)^{\alpha^*} + \gamma^{\alpha^*} = 1 + 2\gamma$$

for  $\gamma < 0.318$ , and a non-stationary dense regime for  $\gamma > (\sqrt{5} - 1)/2 \simeq 0.618$ , while the intermediate range  $0.318 < \gamma < 0.618$  corresponds to stationary scale-free degree distributions in the non-linear asymptotic regime (*i.e.*  $(1 + \gamma)^\alpha + \gamma^\alpha = \Delta \leq 1 + 2\gamma$ ) which we would like to investigate numerically in order to determine whether or not it corresponds to a unique pair  $(\alpha, \Delta)$ , see discussion in *Asymptotic methods*.

As can be seen in Fig. S5A, for  $\gamma = 0.1$  the degree distribution becomes almost stationary with the predicted power law exponent ( $\alpha^* + 1 \simeq 2.75$ ) for more than a decade in  $k$  and typical PPI network sizes (about  $10^4$  nodes). Besides, this small value  $\gamma = 0.1$  appears to be within the most biologically relevant range of GDD parameters to fit the available PPI network data, Fig. S6A (orange curves), with a refined duplication-divergence model of PPI network evolution at the level of protein domains instead of entire proteins, Fig. S6B. Details about this model, which can also take into account *indirect* interactions within protein complexes and protein domain shuffling events, are discussed in ref. [1]. Fig. S5A also shows that the degree distribution and average connectivity of first neighbors are already essentially stationary at small  $k \leq 20$  for PPI networks including  $10^3 - 10^4$  nodes corresponding to typical sizes of empirical PPI networks. The best one-parameter fit of this PPI network data ( $p_k$  and  $g_k$ ) corresponds to  $\gamma = 0.26$ , see Figs. S5 & S6 (cyan curves) and ref. [1]. On the other hand, numerical node degree distributions are still quite far from convergence at large  $k \geq 20$  for  $\gamma = 0.26$  and even more so in the non-linear regime with  $\gamma = 0.5$  (green curves), even for very large PPI network sizes  $> 10^5$  connected nodes. This is related to the very slow global convergence for  $\gamma = 0.26$  or  $\gamma = 0.5$  by contrast with  $\gamma = 0.1$ , as discussed below, Fig. S7.

Simulation results for the distributions of average connectivity of first neighbor proteins  $g(k)$  [4, 6] are also shown in Fig. S5A.  $g(k)$  is in fact normalized as  $g(k) \cdot \bar{k}/k^2$  to rescale its main divergence [1]. A slow decrease of  $g(k)$  is followed by an abrupt fall at a threshold connectivity  $k_h$  beyond which nodes (with  $k > k_h$ ) are rare and can be seen as “hubs” in individual graphs of size  $N$  ( $k_h$  corresponds to  $N \cdot p_{k_h} \sim 1$ ). Degree distributions for large  $k > k_h$  are governed by a “hub” statistics which is different, in general, from the predicted asymptotic statistics (although this is not so visible from the node degree distribution curves).

Fig. S5B shows the evolution of the node degree distribution for the same most asymmetric whole genome duplication-divergence model with  $\gamma = 0.7$ , corresponding to the predicted non-stationary dense regime. As can be seen, the numerical curves obtained for different graph sizes are clearly non-stationary in the regions of small and large  $k$ , with local slopes varying considerably with the number of duplications (and mean size). This was obtained using the efficient numerical approach ignoring connectivity correlations (see above), which cannot, however, be used to study the average connectivity of first neighbor proteins  $g(k)$  (direct simulations can be performed though up to about  $N = 10^4$  nodes, as shown in Fig. S5B).

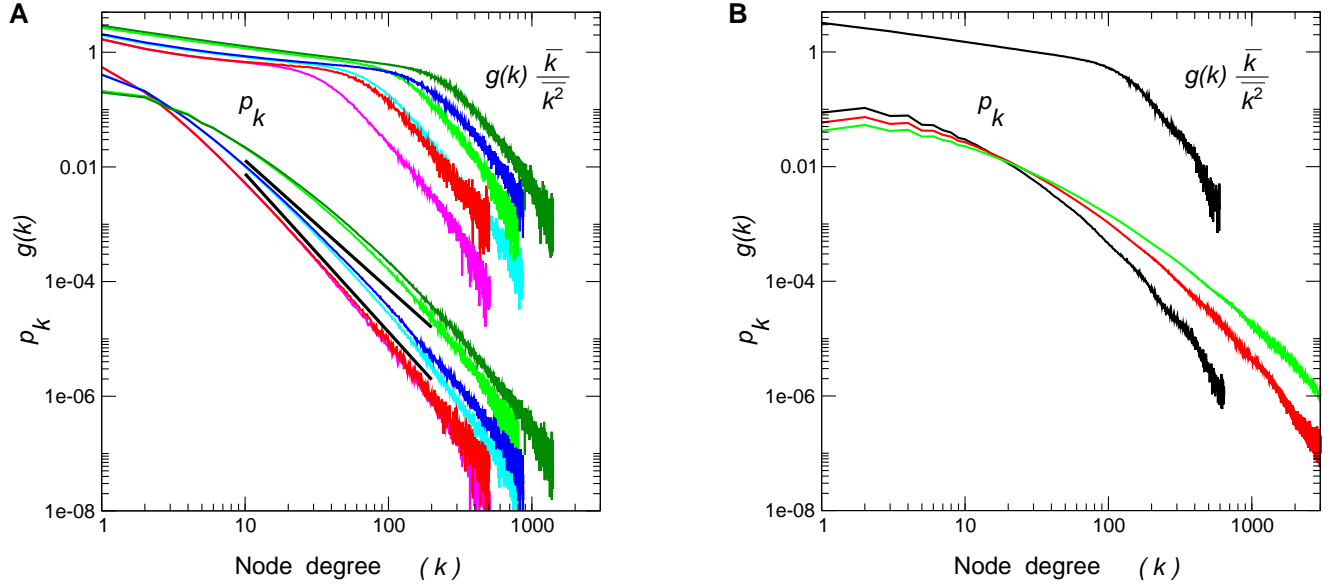

Figure S5: Simulation results in the whole genome duplication-divergence limit with largest divergence asymmetry ( $q = 1$ ,  $\gamma_{oo} = 1$ ,  $\gamma_{nn} = 0$ ,  $\gamma_{on} = \gamma = 0.1, 0.26, 0.5, 0.7$ ). **A.** Distribution  $p_k$  and  $g(k)$  obtained for  $\gamma = 0.1$  with  $n = 50$  (magenta,  $N = 7 \times 10^3$ ,  $L = 9 \times 10^3$ ) and  $n = 60$  (red,  $N = 4 \times 10^4$ ,  $L = 5.3 \times 10^4$ ); for  $\gamma = 0.26$  with  $n = 25$  (cyan,  $N = 1.7 \times 10^4$ ,  $L = 3.5 \times 10^4$ ) and  $n = 30$  (blue,  $N = 1.3 \times 10^5$ ,  $L = 2.9 \times 10^5$ ); for  $\gamma = 0.5$  with  $n = 16$  (light green,  $N = 1.3 \times 10^4$ ,  $L = 6.4 \times 10^4$ ) and  $n = 18$  (green,  $N = 4.6 \times 10^4$ ,  $L = 2.7 \times 10^5$ ); average curves are obtained for 1000 iterations. **B.** Distribution  $p_k$  obtained for  $\gamma = 0.7$  with  $n = 12$  (black,  $N = 4 \times 10^3$ ,  $L = 3.6 \times 10^4$ ,  $g(k)$  is also shown in this case),  $n = 16$  (red,  $N = 6 \times 10^4$ ,  $L = 1.2 \times 10^6$ ) and  $n = 20$  (green,  $N = 9 \times 10^5$ ,  $L = 3.9 \times 10^7$ ). Distributions are averaged over 2000 iterations.

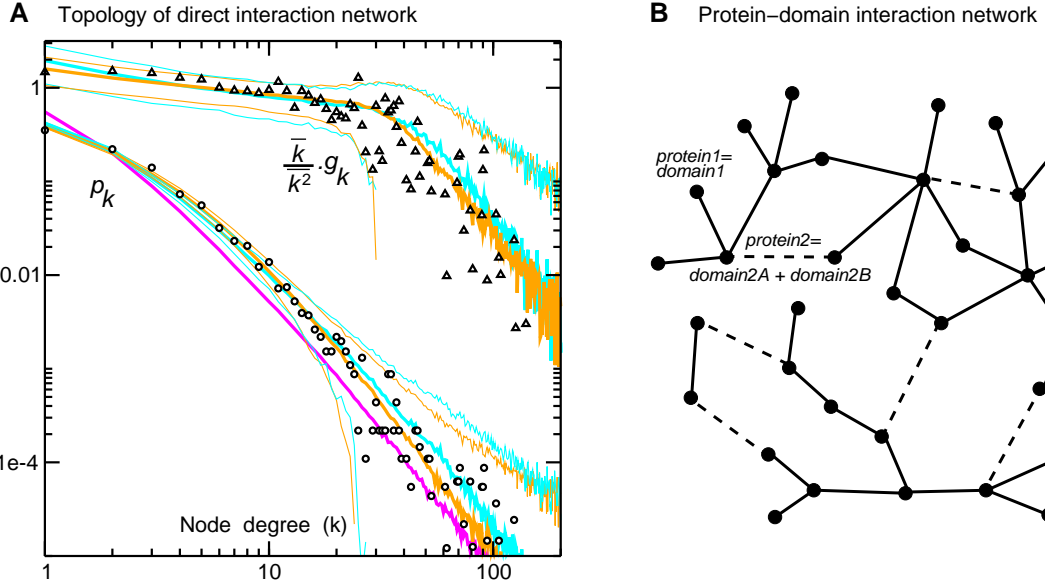

Figure S6: Comparison between empirical PPI network data and finite-size, duplication-divergence simulations. **A.** Comparison with protein direct interaction data for Yeast from BIND [9] database (4576 proteins, 9133 physical interactions,  $\bar{k} = 3.99$ ,  $\bar{k}^2 = 106$ ). Both connectivity distribution  $p_k$  (open circles) and average connectivity of first neighbor proteins  $g_k$  [6] (open triangles) are shown. Data are statistically averaged to account for gaps in connectivities for large  $k \geq 20$ , due to the finite size of Yeast PPI network. (cyan curves) Best one-parameter fit of the data ( $p_k$  and  $g_k$ ) with the previous genome duplication-divergence model with  $\gamma = 0.26$ , Fig. S5A (cyan curves). Numerical distributions are averaged over 10,000 network realizations (central cyan lines) and averaged distributions plus or minus two standard deviations ( $\pm 2\sigma$ ) are also displayed to show the predicted dispersions (upper and lower cyan lines). (orange curves) Best two-parameter fit of the data with a genome duplication-divergence model at the level of protein domains (see **B**) with effective shuffling of protein domains (see ref. [1] for details about this model). The two adjusted parameters ( $\gamma = 0.1$  and  $\lambda = 0.3$ ) correspond to a network growth rate of 20% ( $1 + 2\gamma$ ) and an average of 1.5 ( $1/(1 - \lambda)$ ) protein-binding domains per protein, in good agreement with known estimates [1]. (magenta curve) The connectivity distribution of the underlying single-domain network (corresponding to  $\gamma = 0.1$  and  $\lambda = 0.0$  in Fig. S5A, magenta) is also shown to illustrate the corresponding changes from the single-domain network (magenta curve) to the multi-domain protein network (orange curves with  $\lambda = 0.3$ ). **B.** PPI network model based on domain-domain interactions and multi-domain proteins with  $1/(1 - \lambda)$  domains per protein.



Finally, we have studied numerically the convergence of the GDD model for these four parameter regimes,  $\gamma = 0.1, 0.26, 0.5$  and  $0.7$ . The results are presented in terms of  $\Delta^{(n)}$  (Fig. S7A) and its distribution (Fig. S7B) as well as through the node variance  $\chi_N^{(n)} = (\langle N^{(n)2} \rangle - \langle N^{(n)} \rangle^2)^{1/2} / \langle N^{(n)} \rangle$  (Fig. S7C). Fig. S7A confirms that the convergence is essentially achieved for  $\gamma = 0.1$  while  $\gamma = 0.26, \gamma = 0.7$  and above all  $\gamma = 0.5$  are much further away from their asymptotic limits. For instance, we have  $\Delta^{(n)} \simeq 1.86$  for  $\gamma = 0.5$  when  $\langle N^{(n)} \rangle \simeq 10^7$  nodes, while we know from the main asymptotic analysis detailed earlier that  $1.9318 \leq \Delta \leq 2$  in the corresponding asymptotic limit. Yet, it is interesting to observe that these numerical simulations suggest that the asymptotic form for the non-linear regime  $\gamma = 0.5$  might still be unique, as convergence appears to be fairly insensitive to topological details of the initial graphs (Fig. S7A) and stochastic dispersions of the evolutionary trajectories: distributions of  $\Delta^{(n)}$  become even more narrow with successive duplications (Fig. S7B), while the dispersion in network size given by  $\chi_N^{(n)}$  is typically smaller for non-linear than linear regimes with a very slow increase for large network size ( $\langle N^{(n)} \rangle > 10,000$  nodes) (Fig. S7C). Still, a formal proof of such a unique asymptotic form (if correct) remains to be established, in general, for *non-linear* asymptotic regimes of the GDD model.

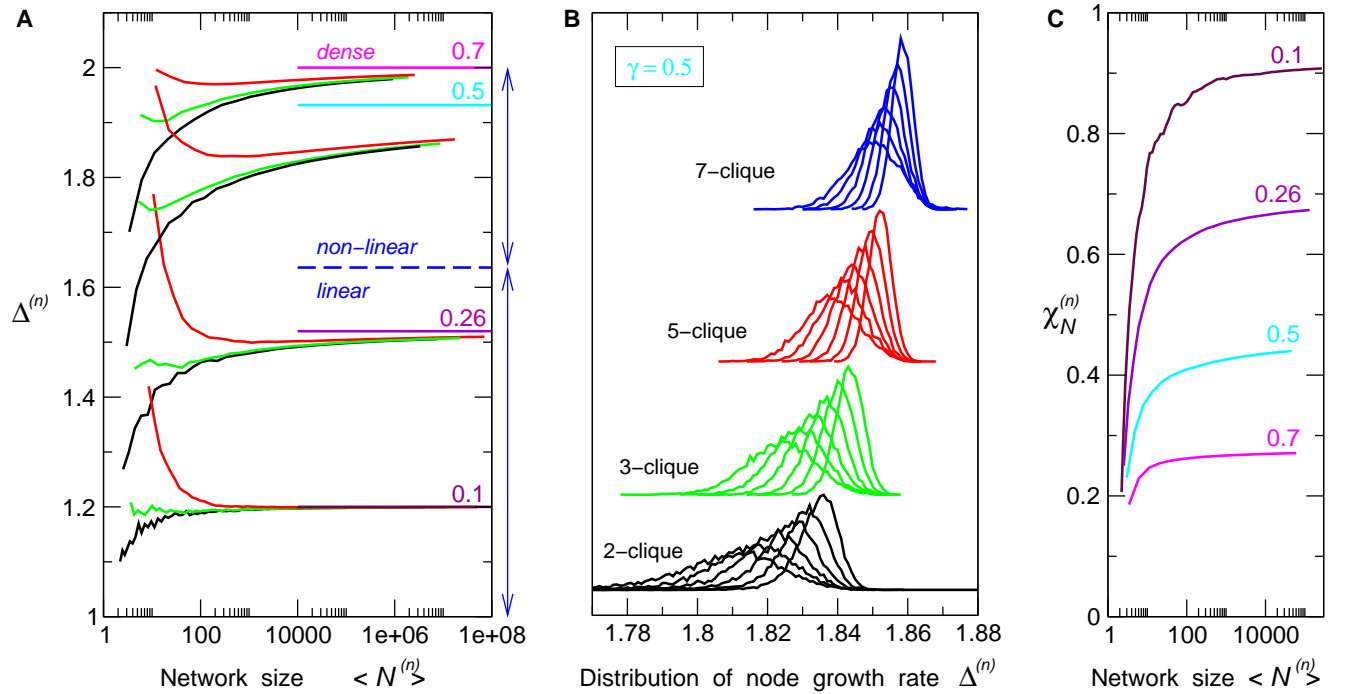

Figure S7: **Asymptotic convergence for the whole genome duplication-divergence limit with largest divergence asymmetry.** **A.** Asymptotic convergence of  $\Delta^{(n)}$  from a simple initial link (black), triangle (green) or 6-clique (red) for the GDD model with  $q = 1, \gamma_{oo} = 1, \gamma_{nn} = 0$  and four values of  $\gamma_{on} = \gamma = 0.1, 0.26, 0.5$  and  $0.7$ . The corresponding asymptotic limits,  $\Delta = 1.2, 1.52, [1.9318; 2]$  and  $2$ , as well as the linear to non-linear regime threshold are shown on the right hand side of the plot. **B.** Distribution of  $\Delta^{(n)}$  for successive duplications from different initial network topologies in the non-linear regime with  $\gamma = 0.5$ . **C.** Node variance  $\chi_N^{(n)} = (\langle N^{(n)2} \rangle - \langle N^{(n)} \rangle^2)^{1/2} / \langle N^{(n)} \rangle$  for the GDD model with  $q = 1, \gamma_{oo} = 1, \gamma_{nn} = 0$  and four values of  $\gamma_{on} = \gamma = 0.1, 0.26, 0.5$  and  $0.7$  and starting from a simple link (2-clique).

### From exponential to dense regimes

An example of GDD model exhibiting an exponential asymptotic degree distribution can be illustrated with a perfectly symmetric whole duplication-divergence model  $q = 1, \gamma_{oo} = \gamma_{on} = \gamma_{nn} = \gamma \leq 0.5$ . The corresponding Fig. S8A shows a good agreement between theoretical prediction and the quasi exponential distribution obtained from simulations with  $\gamma = 0.4 \leq 0.5$  (as  $\gamma \geq 0.5$  correspond to non-stationary dense regimes, see below).

Finally, the same symmetric whole genome duplication-divergence model exhibits also a peculiar property due to the explicit form of its recurrence relation

$$p^{(n+1)}(x) = p^{(n)}((\gamma x + \delta)^2)$$

which happens to be precisely of the class of the link probability distribution Eq.(S49) studied in Appendix A. Hence, in the limit of large  $n$  the corresponding degree distribution should have a scaling form as defined by Eq.(S50). Indeed, the simulation results depicted in Fig. S8B show that the scaling functions  $\bar{k}^{(n)} p_k^{(n)} = w(k/\bar{k}^{(n)})$  plotted for different graph sizes are perfectly close in the asymptotic limit, although the overall evolutionary dynamics is in the non-stationary dense regime, here, with  $\gamma = 0.6 \geq 0.5$  (i.e.  $\bar{k}^{(n)} \rightarrow \infty$  and  $p_k^{(n)} \rightarrow 0$  when  $n \rightarrow \infty$ ).

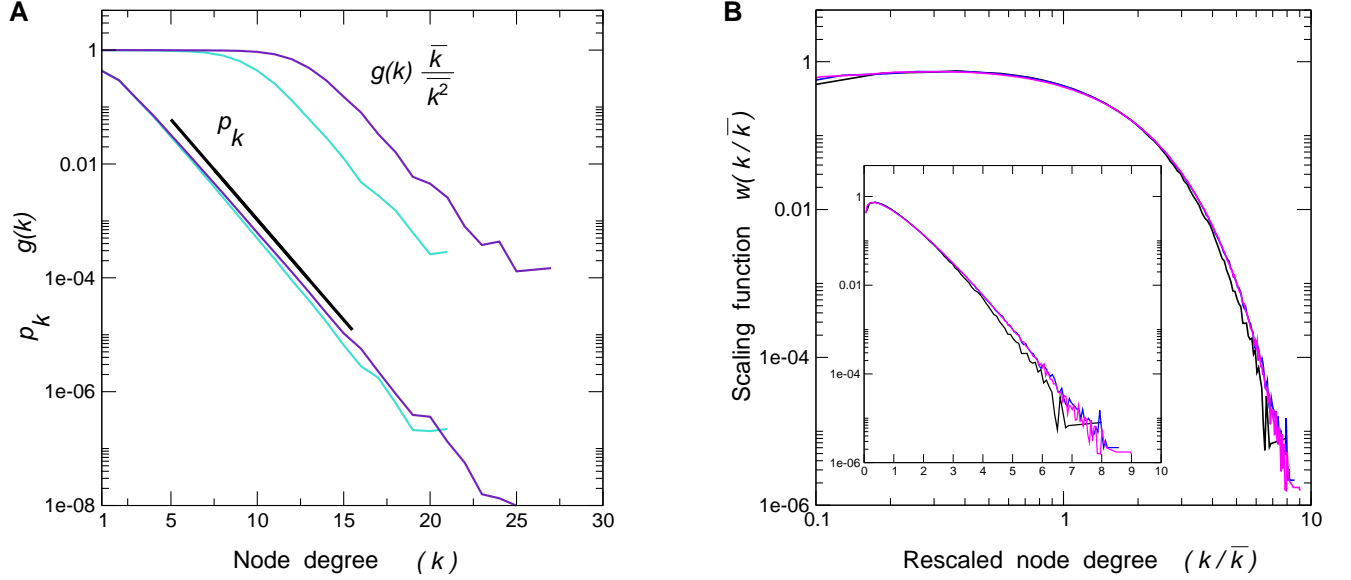

Figure S8: **Simulation results in the whole genome duplication-divergence limit with symmetric gene divergence.** **A.** Distribution  $p_k$  obtained for  $\gamma = 0.4$  with  $n = 15$  (black,  $N = 1.2 \times 10^3$ ,  $L = 1.1 \times 10^3$ ) and  $n = 20$  (blue,  $N = 1.2 \times 10^4$ ,  $L = 1.2 \times 10^4$ ); **B.** Scaling function  $w(k/\bar{k}^{(n)})$  (see text) obtained for  $\gamma = 0.6$  with  $n = 10$  (black,  $N = 1.2 \times 10^3$ ,  $L = 6.3 \times 10^3$ ),  $n = 12$  (blue,  $N = 4.7 \times 10^3$ ,  $L = 3.7 \times 10^4$ ) and  $n = 13$  (magenta,  $N = 9.3 \times 10^3$ ,  $L = 8.8 \times 10^4$ );  $w(k/\bar{k}^{(n)})$  is shown in both log-log and log-lin (inset) representations; average curves are obtained for 1000 iterations.

## Appendices

### A Scaling for Probability Distributions

Let  $p_k^{(n)}$  be a probability distribution whose generating function  $P^{(n)}(x) = \sum_k p_k^{(n)} x^k$  satisfies the following recurrence relation

$$P^{(n+1)}(x) = P^{(n)}[a(x)], \quad (\text{S49})$$

with  $a(x)$  a polynome with positive coefficients of degree  $m > 1$  with  $a(1) = 1$  and  $a'(1) > 1$ . This probability distribution can be shown to exhibit a scaling property

$$p_k^{(n)} = [a'(1)]^{-n} F(k/[a'(1)]^n), \quad n \gg 1. \quad (\text{S50})$$

Indeed, we first remark that any polynome of this kind can be decomposed as

$$a(x) = \prod_{i=1}^{m_1} (\delta_i + \gamma_i x) \prod_{j=1}^{m_2} (a_j(x + c_j)^2 + b_j), \quad m_1 + m_2 = m,$$

where the first product collects the real roots of the polynome while the second product corresponds to all pairs of complex conjugate roots. Since all coefficients are positive,  $\gamma_i$ ,  $\delta_i$ ,  $a_j$ ,  $b_j$  and  $c_j$  are also positive. In addition, we can choose  $\gamma_i + \delta_i = 1$  and  $a_j(1 + c_j)^2 + b_j = 1$  for all  $i$  and  $j$ .

Then, the recurrence relation Eq.(S49) is equivalent to

$$p_s^{(n+1)} = \sum_{k=\lfloor s/m \rfloor}^{D_n} p_k^{(n)} \sum_{l_1=0}^k \cdots \sum_{l_{m_1}=0}^k \binom{k}{l_1} \cdots \binom{k}{l_{m_1}} \gamma_1^{l_1} \delta^{k-l_1} \cdots \gamma_{l_{m_1}} \delta^{k-l_{m_1}} \sum_{h_1=0}^k \sum_{s_1=0}^{2h_1} \cdots \sum_{h_{m_2}=0}^k \sum_{s_{m_2}=0}^{2h_{m_2}} \binom{k}{h_1} \binom{2h_1}{s_1} \cdots \binom{k}{h_{m_2}} \binom{2h_{m_2}}{s_{m_2}} a_1^{h_1} b_1^{k-h_1} c_1^{2h_1-s_1} \cdots a_{m_2}^{h_{m_2}} b_{m_2}^{k-h_{m_2}} c_{m_2}^{2h_{m_2}-s_{m_2}} \delta \left( \sum_i l_i + \sum_j s_j - s \right) \quad (\text{S51})$$

where  $D_n = nmD_0$  is the degree of  $P^{(n)}(x)$ . In the following, we fix  $n \gg 1$  and suppose that the first moment is large  $A = [a'(1)]^n \gg 1$ , so that we can rescale all the variables as

$$x = s/A, \quad y = k/A, \quad y_i = l_i/A, \quad w_j = h_j/A, \quad z_j = s_j/A$$

and finally replace the sums by integrals over rescaled variables. We choose also  $n$  to be sufficiently large to have  $D_n/A \gg 1$ . We then apply Stirling formula to get a continuous approximation for binomial coefficients and use the expected scaling form of  $p_k^{(n)}$  from Eq.(S50), so that, when replacing sums by integrals in the continuous approximation, we obtain,

$$p_s^{(n+1)} = A^{-n} A^{m_1/2+m_2-1} \int_{x/m}^{\infty} dy F(y) \int_0^y \cdots \int_0^y dy_1 \cdots dy_{m_1} \int_0^y dw_1 \int_0^{2w_1} dz_1 \cdots \int_0^y dw_{m_2} \int_0^{2w_{m_2}} dz_{m_2} \delta \left( \sum_i y_i + \sum_j z_j - x \right) e^{Af} G(y, \dots), \quad (\text{S52})$$

with

$$\begin{aligned} f(y, \{y_i\}, \{w_j\}, \{z_j\}) &= \sum_i \left( y \ln y - (y - y_i) \ln(y - y_i) - y_i \ln y_i + y_i \ln \gamma_i + (y - y_i) \ln \delta_i \right) + \\ &\sum_j \left( y \ln y - (y - w_j) \ln(y - w_j) - w_j \ln w_j + w_j \ln a_j + (y - w_j) \ln b_j + \right. \\ &\left. + 2w_j \ln 2w_j - (2w_j - z_j) \ln(2w_j - z_j) - z_j \ln z_j + (2w_j - z_j) \ln c_j \right) \end{aligned}$$

and

$$G(y, z_1, \dots, z_m) = \prod_{i=1}^{m_1} \left( \frac{y}{2\pi y_i (y - y_i)} \right)^{1/2} \prod_{j=1}^{m_2} \left( \frac{2y}{(2\pi)^2 z_j (y - w_j) (2w_j - z_j)} \right)^{1/2}.$$

Since  $A$  is large, we can apply the Laplace method first to the  $m_1 + 2m_2$  internal integrals. We have to minimize  $f$  with respect to  $y_i$ ,  $w_j$  and  $z_j$  given that  $\sum_i y_i + \sum_j z_j = x$ . This can be performed by the Lagrange multiplier method by looking for the minimum of

$$f(y, \{y_i\}, \{w_j\}, \{z_j\}) - \lambda \left( \sum_i y_i + \sum_j z_j - x \right)$$

and setting  $\sum_i y_i + \sum_j z_j = x$  for the solution.

In this way we obtain a unique minimum at

$$y_i^0 = \frac{y}{a_i}, \quad w_j^0 = \frac{y}{h_j}, \quad z_j^0 = \frac{2y}{h_j g_j},$$

with

$$a_i = 1 + \frac{\delta_i}{\gamma_i} e^\lambda, \quad g_j = 1 + c_j e^\lambda, \quad h_j = 1 + \frac{b_j e^{2\lambda}}{a_j g_j^2}$$

and  $\lambda$  is determined implicitly as a function of  $x$  and  $y$  from the normalization condition

$$y \sum_i \frac{1}{a_i} + 2y \sum_j \frac{1}{h_j g_j} = x.$$

After some algebra, we find that the values of  $f$  in the minimum is given by

$$\begin{aligned} w(y, x) = f(y, \{y_i^0\}, \{w_j^0\}, \{z_j^0\}) &= y \sum_i \left( -(1 - a_i^{-1}) \ln(1 - a_i^{-1}) - a_i^{-1} \ln a_i^{-1} + a_i^{-1} \ln \gamma_i + (1 - a_i^{-1}) \ln \delta_i \right) + \\ &y \sum_j \left( -(1 - h_j^{-1}) \ln(1 - h_j^{-1}) - h_j^{-1} \ln h_j^{-1} + h_j^{-1} \ln a_j + (1 - h_j^{-1}) \ln b_j + \right. \\ &\left. - 2h_j^{-1} [-(1 - g_j^{-1}) \ln(1 - g_j^{-1}) - g_j^{-1} \ln g_j^{-1} + (1 - g_j^{-1}) \ln c_j] \right) \end{aligned}$$

Therefore we write the leading contribution from the  $m_1 + 2m_2$  internal integrals in Eq.(S52) as,

$$e^{Aw(y,x)}g(y,x)A^{-(m_1+2m_2-1)/2}, \quad (\text{S53})$$

with  $g(y,x)$  collecting all the contributions of the integrals, while the power of  $A$  can just be determined by the number of integrations left after integrating the delta function.

The last integral to calculate in Eq.(S52) is on  $y$

$$A^{-1/2} \int_{x/m}^{\infty} dy H(y,x) F(y) e^{Aw(y,x)}$$

where we have collected all slow varying terms and constants in  $H(y,x)$ . When applying the Laplace method we calculate the derivative of  $w(y,x)$  with respect to  $y$  that turns out to have a simple expression

$$\partial_y w(y^0, x) = \sum_i \ln\left(\frac{\delta_i a_i}{a_i - 1}\right) + \sum_j \ln\left(\frac{b_j h_j}{h_j - 1}\right) = \sum_i \ln(\delta_i + \gamma_i e^{-\lambda}) + \sum_j \ln(a_j(e^{-\lambda} + c_j)^2 + b_j) = 0.$$

The last condition is equivalent to  $\prod_i (\delta_i + \gamma_i e^{-\lambda}) \prod_j (a_j(e^{-\lambda} + c_j)^2 + b_j) = 1$  which has a unique solution  $\lambda = 0$ , and for the saddle point we get  $y^0 = x / (\sum_i \gamma_i + 2 \sum_j a_j(1 + c_j)) = x/a'(1)$ .

Now it is just a matter of tedious calculations to prove that the prefactor shrinks to  $1/a'(1)$  so that

$$p_k^{(n+1)} = [a'(1)]^{-n-1} F\left(k/[a'(1)]^{n+1}\right), \quad [a'(1)]^{n+1} = A \cdot a'(1),$$

as anticipated from the scaling expression Eq.(S50). We were not able to determine the exact shape of the scaling function  $F$  which is strongly dependent on the initial probability distribution (an example is shown in Fig. S8B).

## B Recurrence relations on $H^{(n)}$ and $T^{(n)}$

In order to relate  $H^{(n)}$  and  $H^{(n+1)}$  we remark that by partial duplication process one motif  $(k, l)$  of type Fig. S4B can generate up to three new motifs of this kind. If the middle link of this motif links two  $s$  nodes (probability  $(1 - q)^2$ ), the motif itself is kept with the probability  $\gamma_{ss}$  and its external connectivities are modified in the same way as the connectivities in the fundamental evolutionary recurrence, *i.e.*,

$$x^k y^l \mapsto [A_s(x)]^k [A_s(y)]^l,$$

so that the contribution of  $ss$  links to the  $H^{(n+1)}$  is given by

$$(1 - q)^2 \gamma_{ss} F^{(n)}(A_s(x), A_s(y)).$$

If the middle link of the motif connects one  $s$  and one  $o$  nodes (proba  $q(1 - q)$ ), the link is presented with probability  $\gamma_{so}$ , and we have to substitute

$$x^k y^l \mapsto [A_s(x)]^k [A_o(y)]^l$$

for external links plus one new link  $sn$  which gives the factor  $(\delta_{sn} + \gamma_{sn}x)$ . By itself this link can create a new motif whose consecutive substitution is

$$x^k y^l \mapsto [A_s(x)]^k [A_n(y)]^l.$$

Therefore, the contribution of these two kinds of motifs is

$$q(1 - q)\gamma_{so}(\delta_{sn} + \gamma_{sn}x)H^{(n)}(A_s(x), A_o(y)) + q(1 - q)\gamma_{sn}(\delta_{so} + \gamma_{so}x)H^{(n)}(A_s(x), A_n(y)),$$

and the contribution from motifs with the middle link  $os$  is just obtained through the permutation  $x \leftrightarrow y$

$$q(1 - q)\gamma_{so}(\delta_{sn} + \gamma_{sn}y)H^{(n)}(A_o(x), A_s(y)) + q(1 - q)\gamma_{sn}(\delta_{so} + \gamma_{so}y)H^{(n)}(A_n(x), A_s(y)).$$

Finally, motifs with the middle  $oo$  link can create 3 new motifs whose common contribution is obtained the same way as above

$$q^2 \gamma_{oo}(\delta_{on} + \gamma_{on}x)(\delta_{on} + \gamma_{on}y)H^{(n)}(A_o(x), A_o(y)) + q^2 \gamma_{on}(\delta_{oo} + \gamma_{oo}x)(\delta_{nn} + \gamma_{nn}y)H^{(n)}(A_o(x), A_n(y)) + q^2 \gamma_{on}(\delta_{nn} + \gamma_{nn}x)(\delta_{oo} + \gamma_{oo}y)H^{(n)}(A_n(x), A_o(y)) + q^2 \gamma_{nn}(\delta_{on} + \gamma_{on}x)(\delta_{on} + \gamma_{on}y)H^{(n)}(A_n(x), A_n(y))$$

By consequence, when collecting all this contributions we get a recurrence relation on the generating function  $H^{(n)}$

$$\begin{aligned}
H^{(n+1)}(x, y) = & (1 - q)^2 \gamma_{ss} F^{(n)}(A_s(x), A_s(y)) + \\
& + q(1 - q) \gamma_{so} (\delta_{sn} + \gamma_{sn} x) H^{(n)}(A_s(x), A_o(y)) + q(1 - q) \gamma_{sn} H^{(n)}(A_s(x), A_n(y)) + (x \leftrightarrow y) + \\
& + q^2 \gamma_{oo} (\delta_{on} + \gamma_{on} x) (\delta_{on} + \gamma_{on} y) H^{(n)}(A_o(x), A_o(y)) + q^2 \gamma_{on} (\delta_{oo} + \gamma_{oo} x) (\delta_{nn} + \gamma_{nn} y) H^{(n)}(A_o(x), A_n(y)) + \\
& + q^2 \gamma_{on} (\delta_{nn} + \gamma_{nn} x) (\delta_{oo} + \gamma_{oo} y) H^{(n)}(A_n(x), A_o(y)) + q^2 \gamma_{nn} (\delta_{on} + \gamma_{on} x) (\delta_{on} + \gamma_{on} y) H^{(n)}(A_n(x), A_n(y))
\end{aligned} \tag{S54}$$

This relation preserves explicitly the symmetry with respect to  $x \leftrightarrow y$ .

The recurrence relation on  $T^{(n)}$  is derived using the same arguments as above. We remark first that a triangle already presented in the graph can generate at most 7 new triangles, or more precisely no new triangle if it has 3s nodes, one new triangle if it has 1o/2s nodes, up to 3 new triangles for 2o/1s nodes, and at most 7 new triangles when it consists of 3o nodes. As previously, for external links of the motif we just have to replace  $x, y$  or  $z$  by the respective functions  $A_s, A_o$  or  $A_n$ . The contribution of 3s triangles is

$$(1 - q)^3 \gamma_{ss}^3 T^{(n)}(A_s(x), A_s(y), A_s(z)),$$

the contribution of 1o/2s triangles

$$q(1 - q)^2 \gamma_{so}^2 \gamma_{ss} (\delta_{sn} + \gamma_{sn} y) (\delta_{sn} + \gamma_{sn} z) T^{(n)}(A_o(x), A_s(y), A_s(z)) + \tag{S55}$$

$$+ q(1 - q)^2 \gamma_{sn}^2 \gamma_{ss} (\delta_{so} + \gamma_{so} y) (\delta_{so} + \gamma_{so} z) T^{(n)}(A_n(x), A_s(y), A_s(z)) + (x \rightarrow y \rightarrow z) \tag{S56}$$

where the last term stands for 4 terms obtained by circular permutations of 3 variables. The contribution of 2o/1s triangle will contain 4 terms plus 8 terms resulting from circular permutations of variables

$$\begin{aligned}
& q^2 (1 - q) \gamma_{so}^2 \gamma_{oo} (\delta_{sn} + \gamma_{sn} x)^2 (\delta_{on} + \gamma_{on} y) (\delta_{on} + \gamma_{on} z) T^{(n)}(A_s(x), A_o(y), A_o(z)) + \\
& q^2 (1 - q) \gamma_{so} \gamma_{on} \gamma_{sn} (\delta_{sn} + \gamma_{sn} x) (\delta_{so} + \gamma_{so} x) (\delta_{oo} + \gamma_{oo} y) (\delta_{nn} + \gamma_{nn} z) T^{(n)}(A_s(x), A_o(y), A_n(z)) + \\
& q^2 (1 - q) \gamma_{so} \gamma_{on} \gamma_{sn} (\delta_{sn} + \gamma_{sn} x) (\delta_{so} + \gamma_{so} x) (\delta_{nn} + \gamma_{nn} y) (\delta_{oo} + \gamma_{oo} z) T^{(n)}(A_s(x), A_n(y), A_o(z)) + \\
& q^2 (1 - q) \gamma_{sn}^2 \gamma_{nn} (\delta_{so} + \gamma_{so} x)^2 (\delta_{on} + \gamma_{on} y) (\delta_{on} + \gamma_{on} z) T^{(n)}(A_s(x), A_n(y), A_n(z)) + \\
& + (x \rightarrow y \rightarrow z).
\end{aligned} \tag{S57}$$

The contribution of 3o triangles contains 8 terms

$$\begin{aligned}
& q^3 \gamma_{oo}^3 (\delta_{on} + \gamma_{on} x)^2 (\delta_{on} + \gamma_{on} y)^2 (\delta_{on} + \gamma_{on} z)^2 T^{(n)}(A_o(x), A_o(y), A_o(z)) + \\
& q^3 \gamma_{nn}^3 (\delta_{on} + \gamma_{on} x)^2 (\delta_{on} + \gamma_{on} y)^2 (\delta_{on} + \gamma_{on} z)^2 T^{(n)}(A_n(x), A_n(y), A_n(z)) + \\
& q^3 \gamma_{oo} \gamma_{on}^2 (\delta_{nn} + \gamma_{nn} x)^2 (\delta_{oo} + \gamma_{oo} y)^2 (\delta_{oo} + \gamma_{oo} z)^2 T^{(n)}(A_n(x), A_o(y), A_o(z)) + (x \rightarrow y \rightarrow z) + \\
& q^3 \gamma_{nn} \gamma_{on}^2 (\delta_{oo} + \gamma_{oo} x)^2 (\delta_{nn} + \gamma_{nn} y)^2 (\delta_{nn} + \gamma_{nn} z)^2 T^{(n)}(A_o(x), A_n(y), A_n(z)) + (x \rightarrow y \rightarrow z).
\end{aligned}$$

When getting all these contributions together, the full recurrence relation on  $T^{(n)}$  is obtained.

The mean number of triangles is evaluated from this relation by setting all variables to one, or directly when applying previous arguments to triangles irrespectively of their external connectivities

$$\langle T^{(n+1)} \rangle = [(1 - q)^3 \gamma_{ss}^3 + q(1 - q)^2 \gamma_{ss} (\gamma_{so}^2 + 3\gamma_{sn}^2)] + \tag{S58}$$

$$+ q^2 (1 - q) (\gamma_{oo} \gamma_{so}^2 + 3\gamma_{nn} \gamma_{sn}^2 + 6\gamma_{so} \gamma_{sn} \gamma_{on}) + \tag{S59}$$

$$+ q^3 (\gamma_{oo}^3 + 3\gamma_{oo} \gamma_{on}^2 + 3\gamma_{nn} \gamma_{on}^2 + \gamma_{nn}^3) \langle T^{(n)} \rangle. \tag{S60}$$

It evidently presents an exponential growth, that is common for many extensive quantities related to the graph dynamics.

## References

1. Evlampiev, K. & Isambert, H. (2007) Modeling protein network evolution under genome duplication and domain shuffling. *BMC Syst. Biol.* **1**:49.
2. Ispolatov, I, Krapivsky, P. L., & Yuryev, A. (2005) Duplication-divergence model of protein interaction network. *Phys Rev E Stat Nonlin Soft Matter Phys.* **71**, 061911.
3. Flajolet, P & Sedgewick, R. (2006) *Analytic Combinatorics*. <http://algo.inria.fr/flajolet/Publications/books.html>.
4. Pastor-Satorras, R, Vázquez, A, & Vespignani, A. (2001) Dynamical and Correlation Properties of the Internet. *Phys. Rev. Lett.* **87**, 258701.
5. Ispolatov, I, Yuryev, A, Mazo, I, & Maslov, S. (2005) Binding properties and evolution of homodimers in protein-protein interaction networks. *Nucleic Acids Res.* **33**, 3629–3635.
6. Maslov, S & Sneppen, K. (2002) Specificity and stability in topology of protein networks *Science* **296**, 910.
7. Watts, D. J & Strogatz, S. H. (1998) Collective dynamics of 'small-world' networks. *Nature* **393**, 440.
8. Strogatz, S. H. (2001) Exploring complex networks. *Nature* **410**, 268.
9. Alfarano, C *et al.* (2005) The Biomolecular Interaction Network Database and related tools 2005 update *Nucleic Acids Res.* **33**, D418–D424.
